# Supplementary material for: Three water-soluble copper(ii) N-heterocyclic carbene complexes: toward copper-catalyzed ketone reduction under sustainable conditions
Source: Royal Society of Chemistry journal article supplement (doi:10.1039/d3dt03406b), 2024-01-01
Supplement: d3dt03406b1.pdf [file d3dt03406b1.pdf]

## Supplementary Information

### **Three water-soluble copper(II) *N*-heterocyclic carbene complexes: Toward copper-catalyzed ketone reduction under sustainable conditions**

Mitu Sharma,<sup>a</sup> Amanda M. Perkins,<sup>a</sup> Raymond Femi Awoyemi,<sup>a</sup> Allison N. Schmittou,<sup>b</sup> Selvam Raju, Brad S. Pierce,<sup>b</sup> Bruno Donnadieu,<sup>a</sup> David O Wipf,<sup>a</sup> Sean L. Stokes,<sup>a</sup> Joseph P. Emerson<sup>a,\*</sup>

*<sup>a</sup>Department of Chemistry, Mississippi State University, Mississippi State, MS, United States*

*<sup>b</sup>Department of Chemistry and Biochemistry, University of Alabama, Tuscaloosa, AL, United States*

## Table of Contents

|                                                                                                                                 |            |
|---------------------------------------------------------------------------------------------------------------------------------|------------|
| <b>Instrumental details</b>                                                                                                     | Page 3     |
| <b>Figure S1:</b> <sup>1</sup> H NMR of compound <b>1</b>                                                                       | Page 4     |
| <b>Figure S2:</b> <sup>13</sup> C NMR of compound <b>1</b>                                                                      | Page 5     |
| <b>Figure S3:</b> <sup>1</sup> H NMR of compound <b>2</b>                                                                       | Page 6     |
| <b>Figure S4:</b> <sup>13</sup> C NMR of compound <b>2</b>                                                                      | Page 7     |
| <b>Figure S5:</b> <sup>1</sup> H NMR of compound <b>3</b>                                                                       | Page 8     |
| <b>Figure S6:</b> <sup>13</sup> C NMR of compound <b>3</b>                                                                      | Page 9     |
| <b>Figure S7:</b> <sup>1</sup> H NMR of compound <b>1a</b>                                                                      | Page 10    |
| <b>Figure S8:</b> <sup>13</sup> C NMR of compound <b>1a</b>                                                                     | Page 11    |
| <b>Figure S9:</b> <sup>1</sup> H NMR of compound <b>2a</b>                                                                      | Page 12    |
| <b>Figure S10:</b> <sup>13</sup> C NMR of compound <b>2a</b>                                                                    | Page 13    |
| <b>Figure S11:</b> <sup>1</sup> H NMR of compound <b>3a</b>                                                                     | Page 14    |
| <b>Figure S12:</b> <sup>13</sup> C NMR of compound <b>3a</b>                                                                    | Page 15    |
| <b>Figure S13:</b> ESI-MS of complex <b>1b</b>                                                                                  | Page 16    |
| <b>Figure S14:</b> UV-Vis spectrum of complex <b>1b</b>                                                                         | Page 17    |
| <b>Figure S15:</b> ESI-MS of complex <b>2b</b>                                                                                  | Page 18    |
| <b>Figure S16:</b> UV-Vis spectrum of complex <b>2b</b>                                                                         | Page 19    |
| <b>Figure S17:</b> ESI-MS of complex <b>3b</b>                                                                                  | Page 20    |
| <b>Figure S18:</b> UV-Vis spectrum of complex <b>3b</b>                                                                         | Page 21    |
| Crystal Structure Report for <b>1b</b> (Tables S1-S8)                                                                           | Page 22-34 |
| Crystal Structure Report for <b>3b</b> (Tables S9-S17)                                                                          | Page 35-50 |
| <b>Figure S19:</b> EPR data for complex <b>1b</b> , <b>2b</b> , and <b>3b</b> in acetonitrile at LNT                            | Page 51    |
| <b>Figure S20:</b> FT-IR spectra of compounds & complexes <b>1a</b> , <b>1b</b> , <b>2a</b> , <b>2b</b> , <b>3a</b> & <b>3b</b> | Page 52    |
| <b>Figure S21:</b> Cyclic voltammograms of (a) <b>1b</b> (red), and (b) <b>3b</b> (blue) in the absence of Fc.                  | Page 53    |
| <b>Figure S22:</b> GC for the hydrogenation of ketone in methanol as solvent                                                    | Page 54    |
| <b>Figure S23:</b> GC for the hydrogenation of ketone in ethanol as solvent                                                     | Page 54    |
| <b>Figure S24:</b> LCMS trace of ( <i>R</i> )- and ( <i>S</i> )-1-(pyridin-2-yl)ethan-1-ol                                      | Page 55    |
| <b>Figure S25:</b> UV-Vis spectrum of ( <i>R</i> )- and ( <i>S</i> )-1-(pyridin-2-yl)ethan-1-ol                                 | Page 55    |
| <b>Figure S26:</b> Absorption spectra of <b>1b</b> , <b>2b</b> , and <b>3b</b> with varying amounts of DNA                      | Page 56    |
| References                                                                                                                      | Page 57    |

## Instrumental details

Mass spectra were obtained using a Bruker microTOF-QII High Resolution MS system with an ESI ionization source operating in positive mode. UV/vis spectra were obtained using an OLIS modernized HP 8452 UV/vis spectrophotometer. IR spectra were recorded using a Thermo Scientific Nicolet 6700 FT-IR. UV-Vis titrations were carried out for DNA binding studies employing the procedure reported previously.<sup>1,2</sup> NMR spectra were obtained using a Bruker AVANCE III 500 MHz spectrometer at room temperature. <sup>1</sup>H chemical shifts are reported vs TMS and are referenced to the residual solvent peaks. An EmStat3 potentiostat (PalmSens Compact Electrochemical Interfaces) was used to acquire cyclic voltammetry data at a glassy carbon working electrode. A three-electrode cell with a graphite auxiliary and a KCl saturated calomel reference (SCE) or Ag wire quasi-reference electrode (Ag QRE) was used in an aqueous electrolyte solution or non-aqueous electrolyte solution, respectively. A concentration of 1.0 mM of ligand **1a**, **2a**, **3a** and complexes **1b**, **2b**, **3b** was used in all experiments. 100 mM of tetrabutylammonium hexafluorophosphate was used as the supporting electrolyte in acetonitrile electrolyte, and a ferrocene/ferrocenium couple was added as an internal reference potential standard. In acetonitrile, the potential was scanned between -1.8 V to 1.5 V vs the Ag QRE starting from the open circuit potential OCP. In an aqueous solution (HClO<sub>4</sub>), the potential was scanned between -0.5 V to 0.5 V vs SCE. The anhydrous acetonitrile solutions were purged with ultra-high purity (UHP) Ar for at least 20 min prior to the electrochemical measurements and Ar was passed over the solution during CV collection. All data were acquired at room temperature. The aqueous CV potentials are reported versus the normal hydrogen electrode (NHE).

The X-ray intensity data was measured at low temperature (T = 100 K), using a three circles goniometer, platform with a fixed Kappa angle at = 54.74 deg Bruker AXS D8 Venture, equipped with a Photon 100 CMOS active pixel sensor detector. A monochromatized copper X-ray radiation ( $\lambda = 1.54178 \text{ \AA}$ ) was selected for the measurement. The structure was solved in a centrosymmetric monoclinic unit cell; Space group: P 1 2(1)/n 1, with Z = 4 for the formula unit, C<sub>24</sub>H<sub>26</sub>CuF<sub>6</sub>N<sub>5</sub>O<sub>3</sub>P. Crystal data and structure refinement details for the complexes **2b** has been reported.<sup>3</sup> X-ray data for **1b** and **3b** are listed in Supplementary Information section Crystal Structure report for **1b** and **3b**. CCDC 2263164 and 2263165 have been deposited for complexes **1b** and **3b**, respectively. Further supplementary crystallographic data for these complexes can be found in the supporting information sections of this paper (cf. Tables SI1b1-SI1b8 for **1b** and Tables SI3b1-3b8 for **3b**). The GC-MS was recorded in a Shimadzu QP-2010S GC-MS and the LC data was recorded in an Agilent HPLC 1200 Series equipped with Chiralpak IB N-5 (4.6x250mm, 5mic) analytical column. The molecular structures of compounds **1b**, **2b** and **3b** were determined unambiguously by measuring X-ray intensity data at low temperature (T = 100 K), using a three-circle goniometer platform with a fixed Kappa angle at = 54.74 deg Bruker AXS D8 Venture, equipped with a Photon 100 CMOS active pixel sensor detector. Monochromatized copper X-ray radiation ( $\lambda = 1.54178 \text{ \AA}$ ) was selected for the measurement.

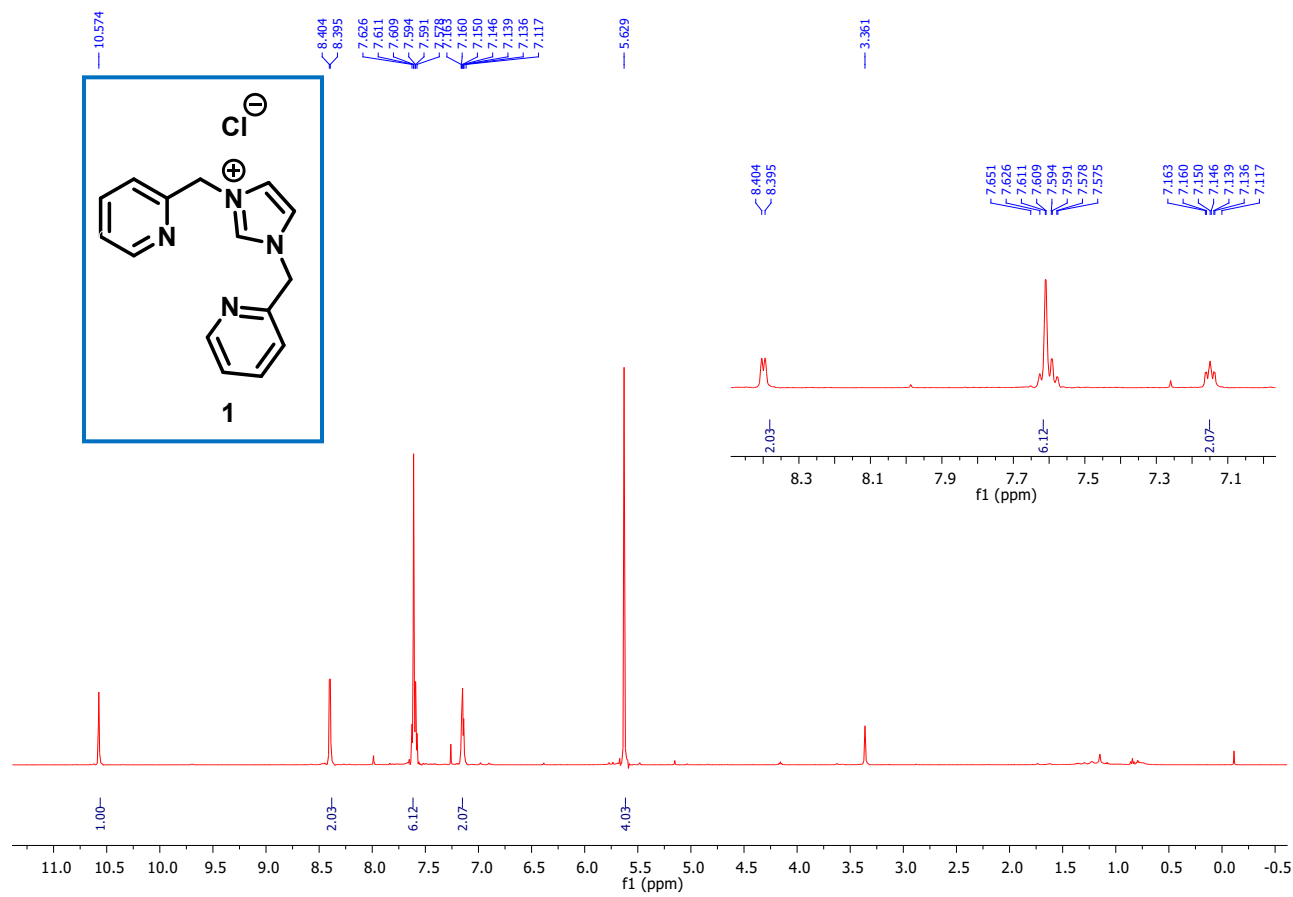

Figure S1: <sup>1</sup>H NMR of compound 1.

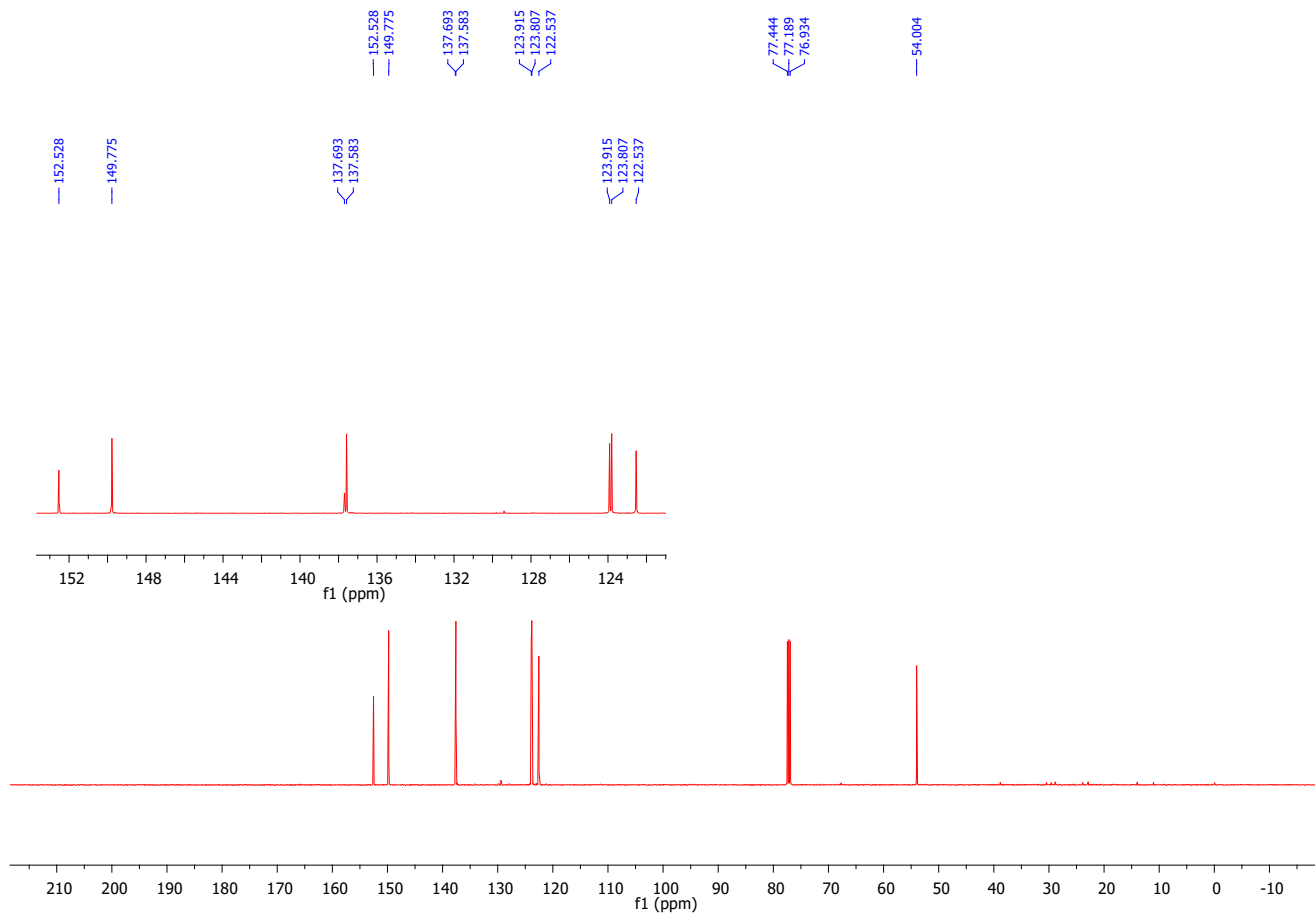

**Figure S2:**  $^{13}\text{C}$  NMR of compound 1.

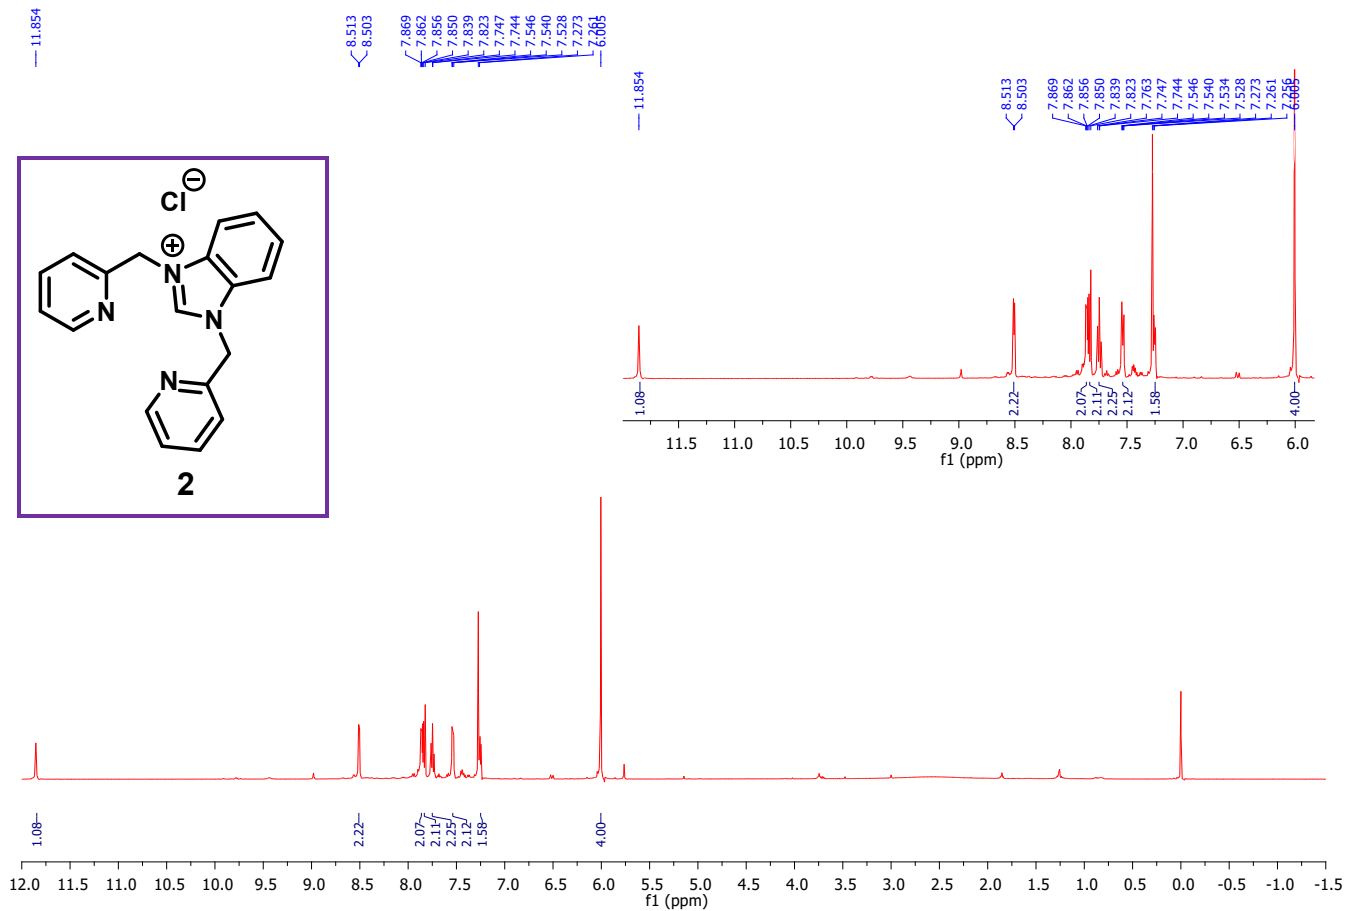

Figure S3: <sup>1</sup>H NMR of compound 2.

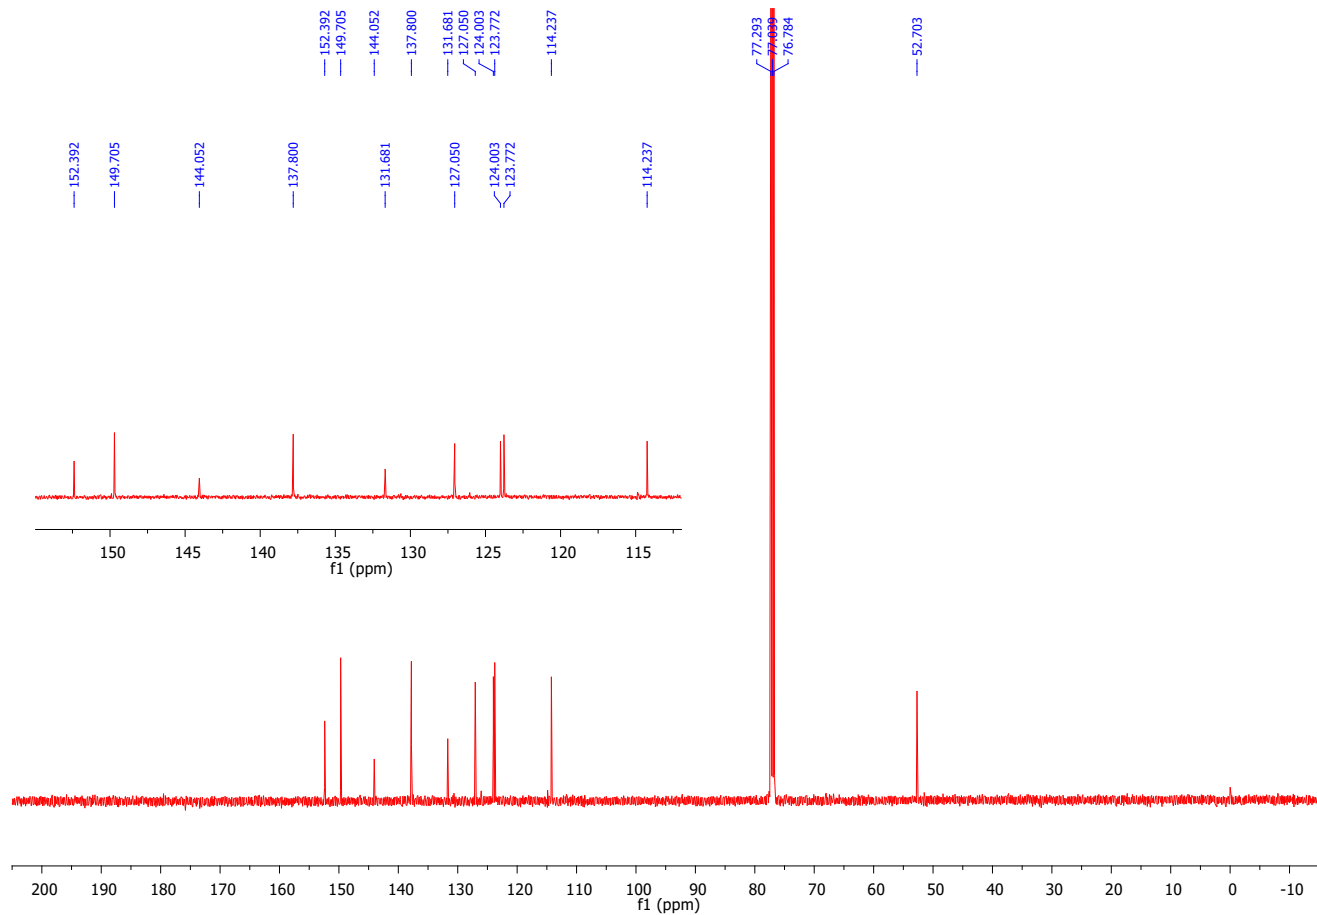

**Figure S4:**  $^{13}\text{C}$  NMR of compound 2.

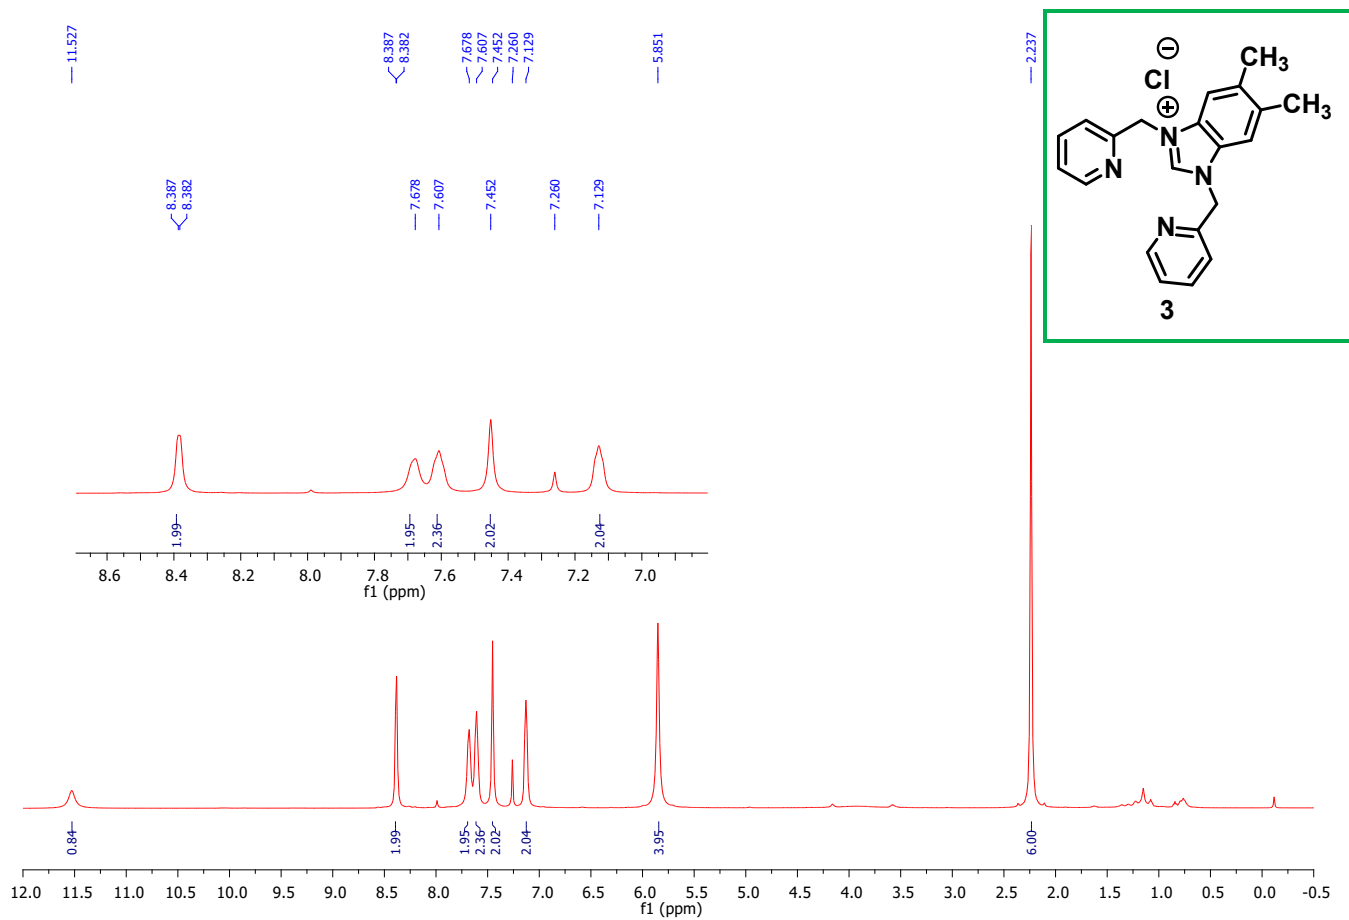

**Figure S5:** <sup>1</sup>H NMR of compound 3.



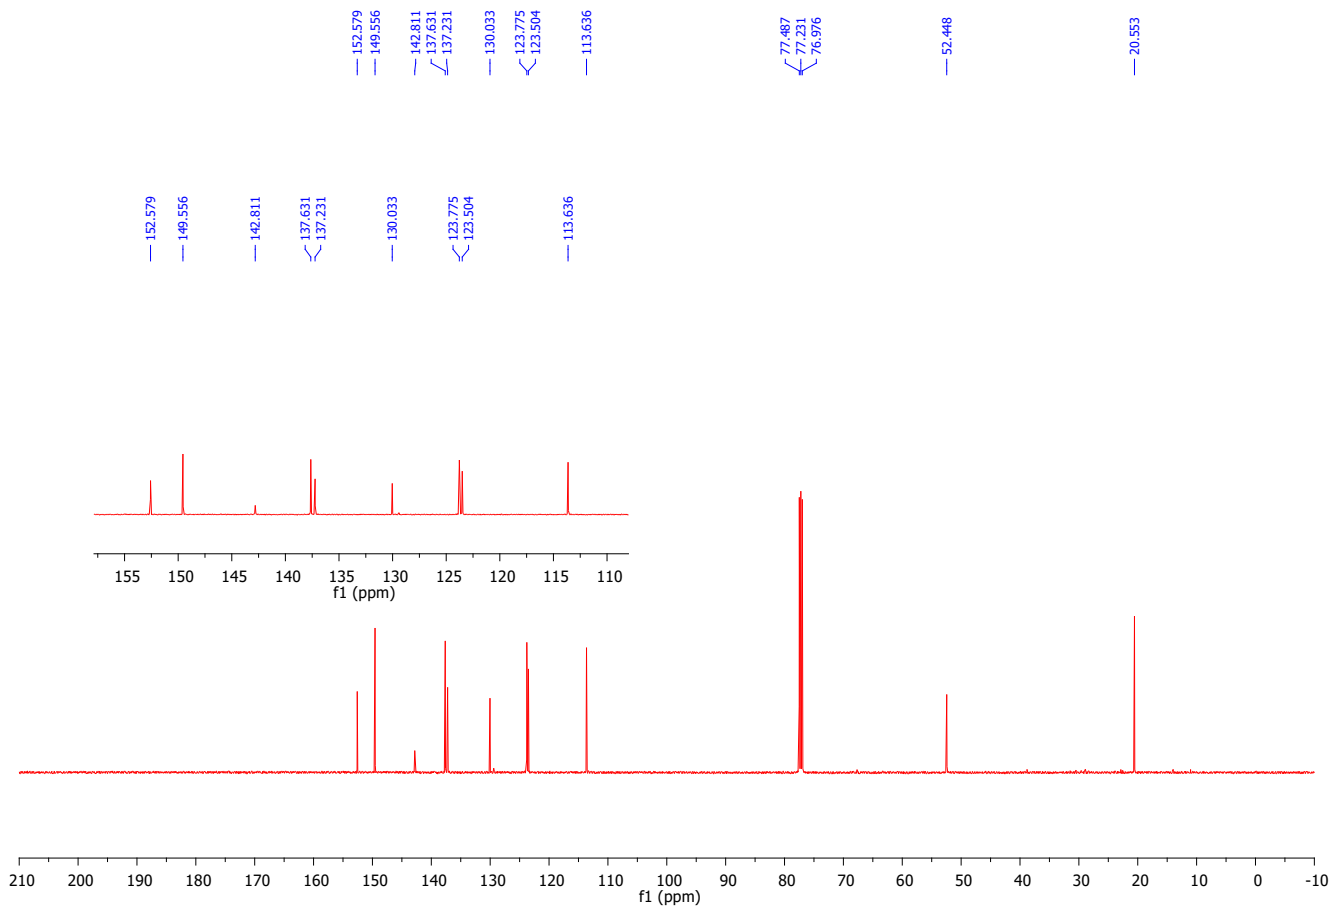

**Figure S6:**  $^{13}\text{C}$  NMR of compound **3**.

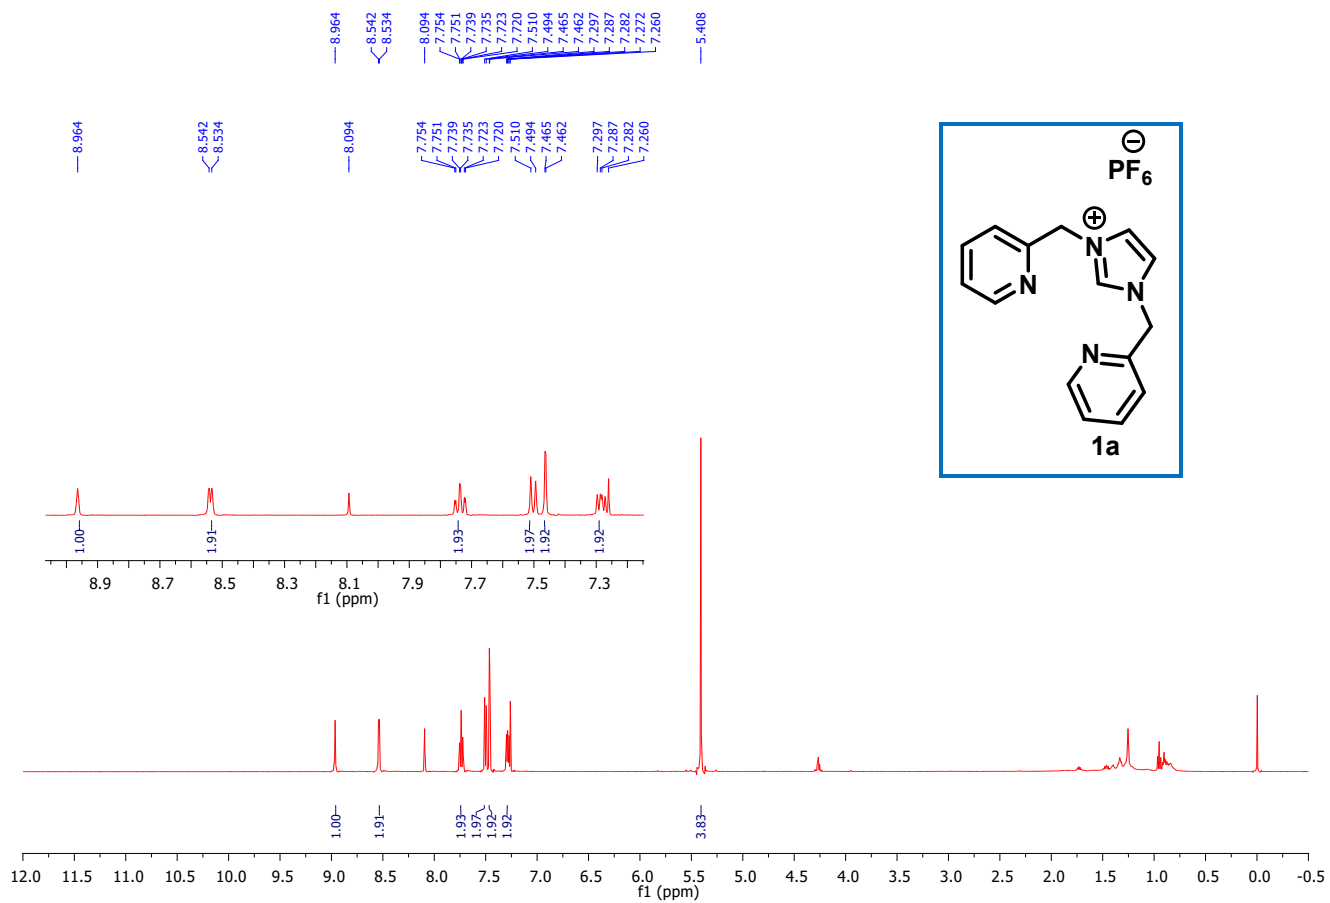

**Figure S7:**  $^1\text{H}$  NMR of compound **1a**

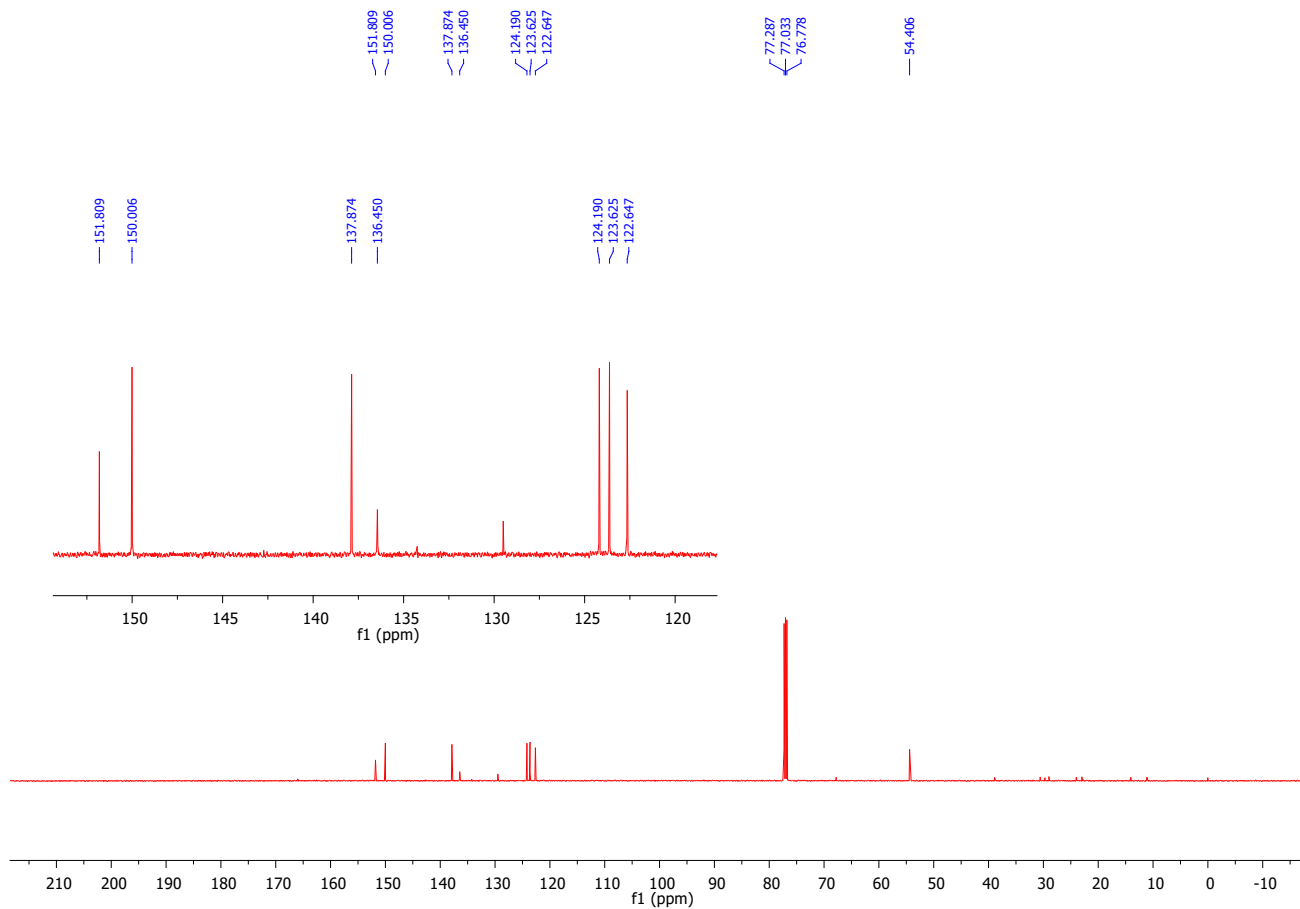

**Figure S8:**  $^{13}\text{C}$  NMR of compound **1a**

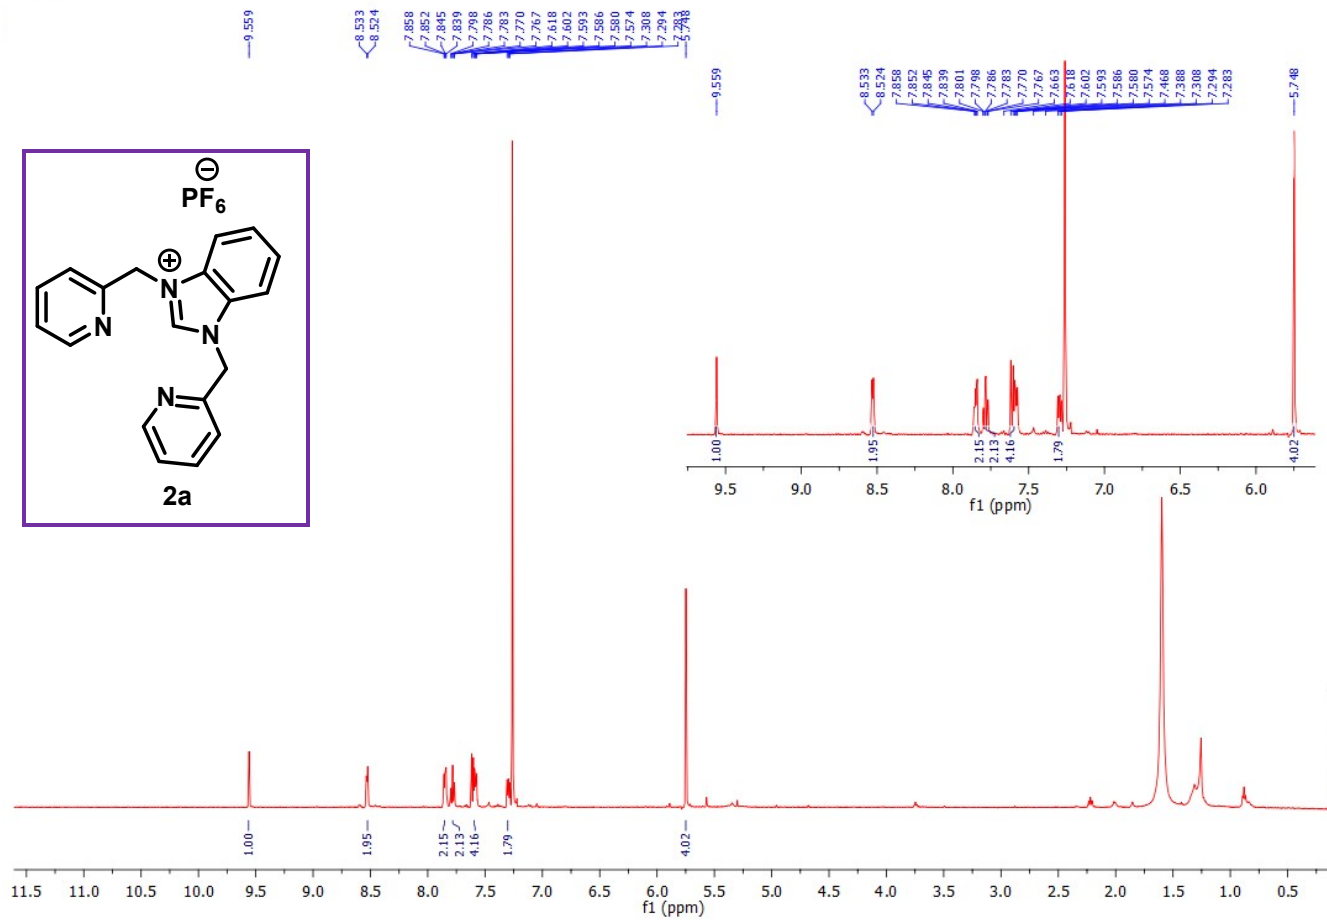

**Figure S9:** <sup>1</sup>H NMR of compound **2a**

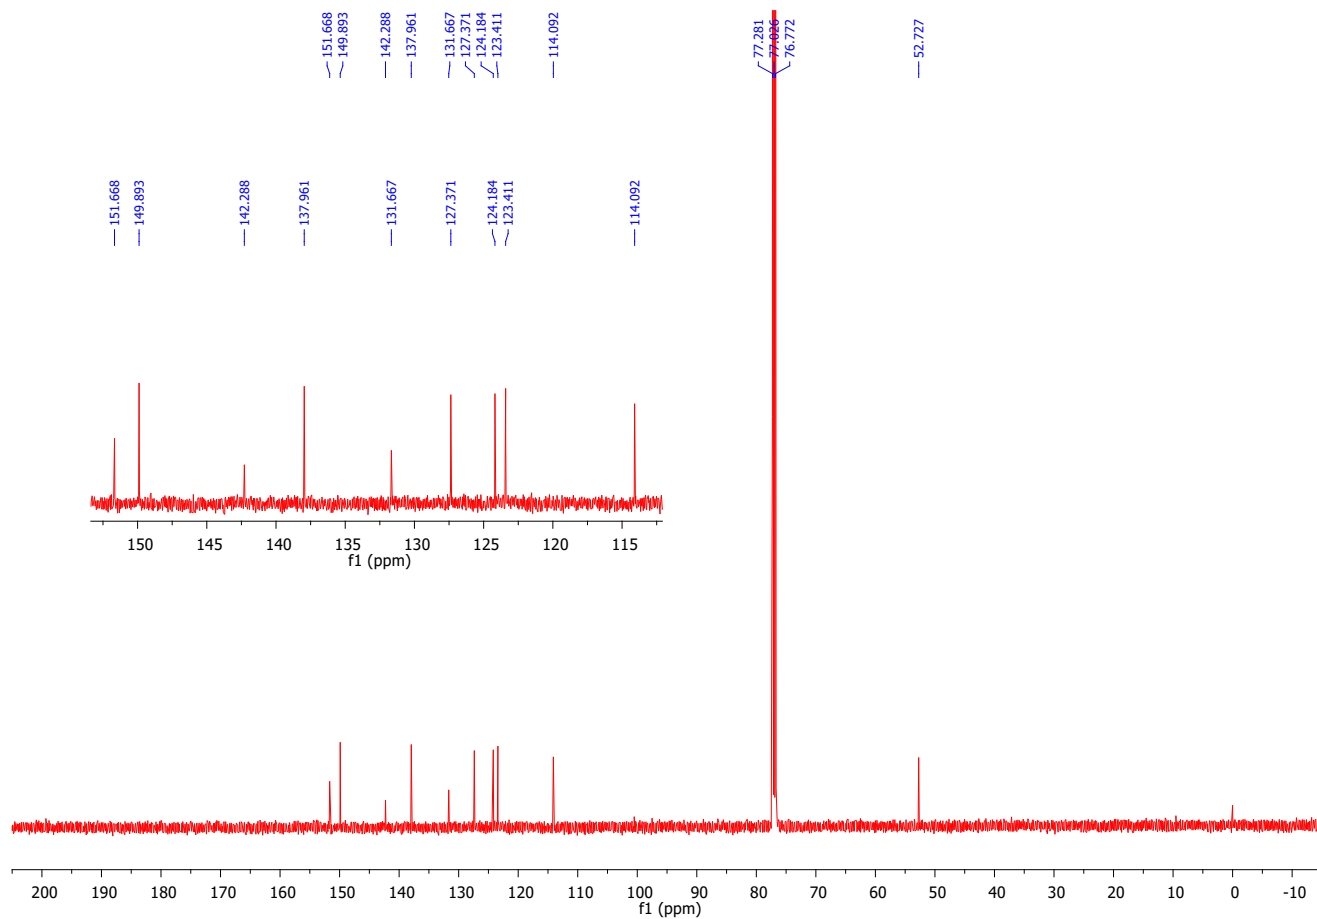

**Figure S10:**  $^{13}\text{C}$  NMR of compound **2a**

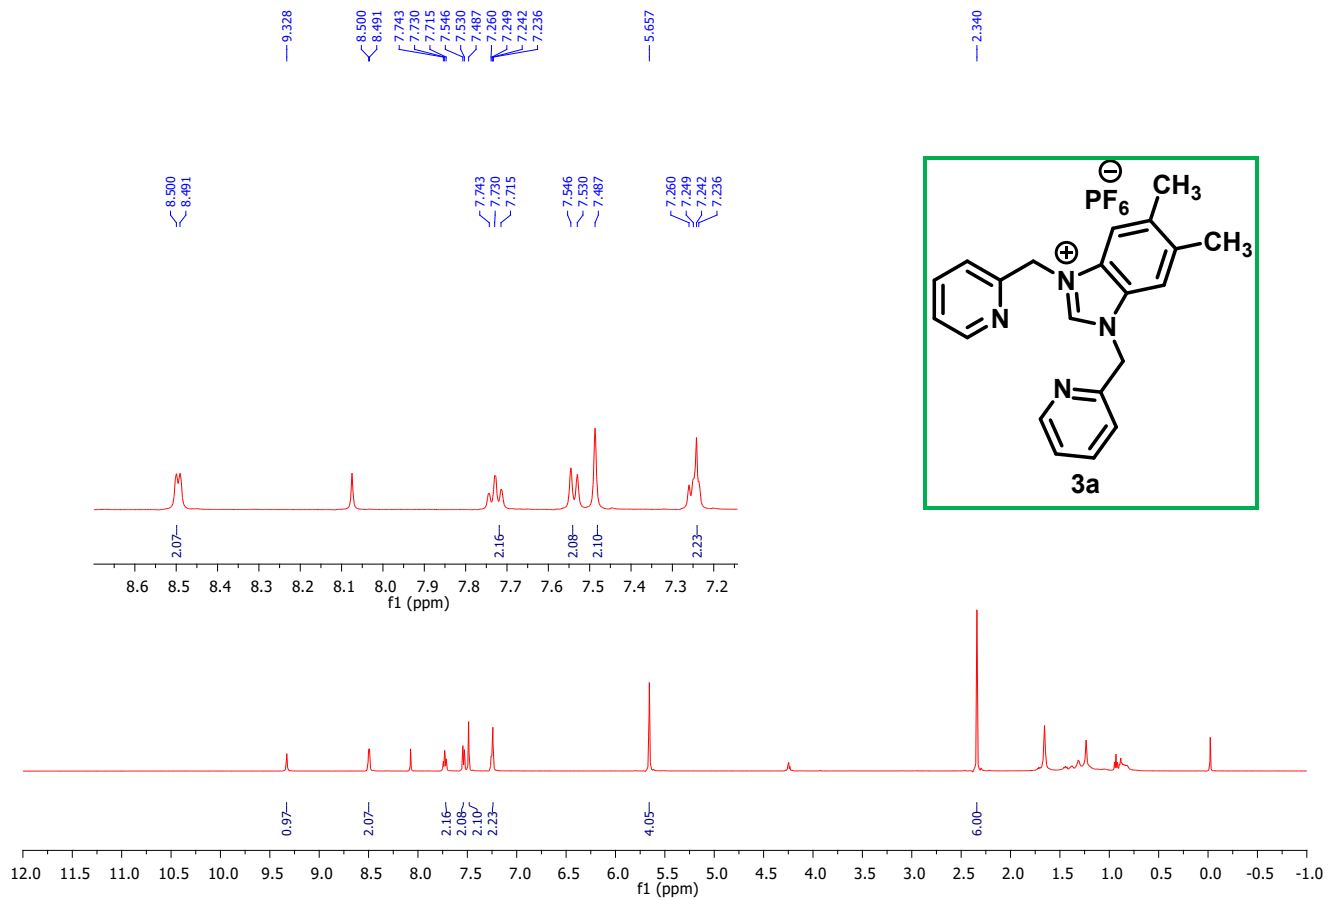

**Figure S11:** <sup>1</sup>H NMR of compound **3a**

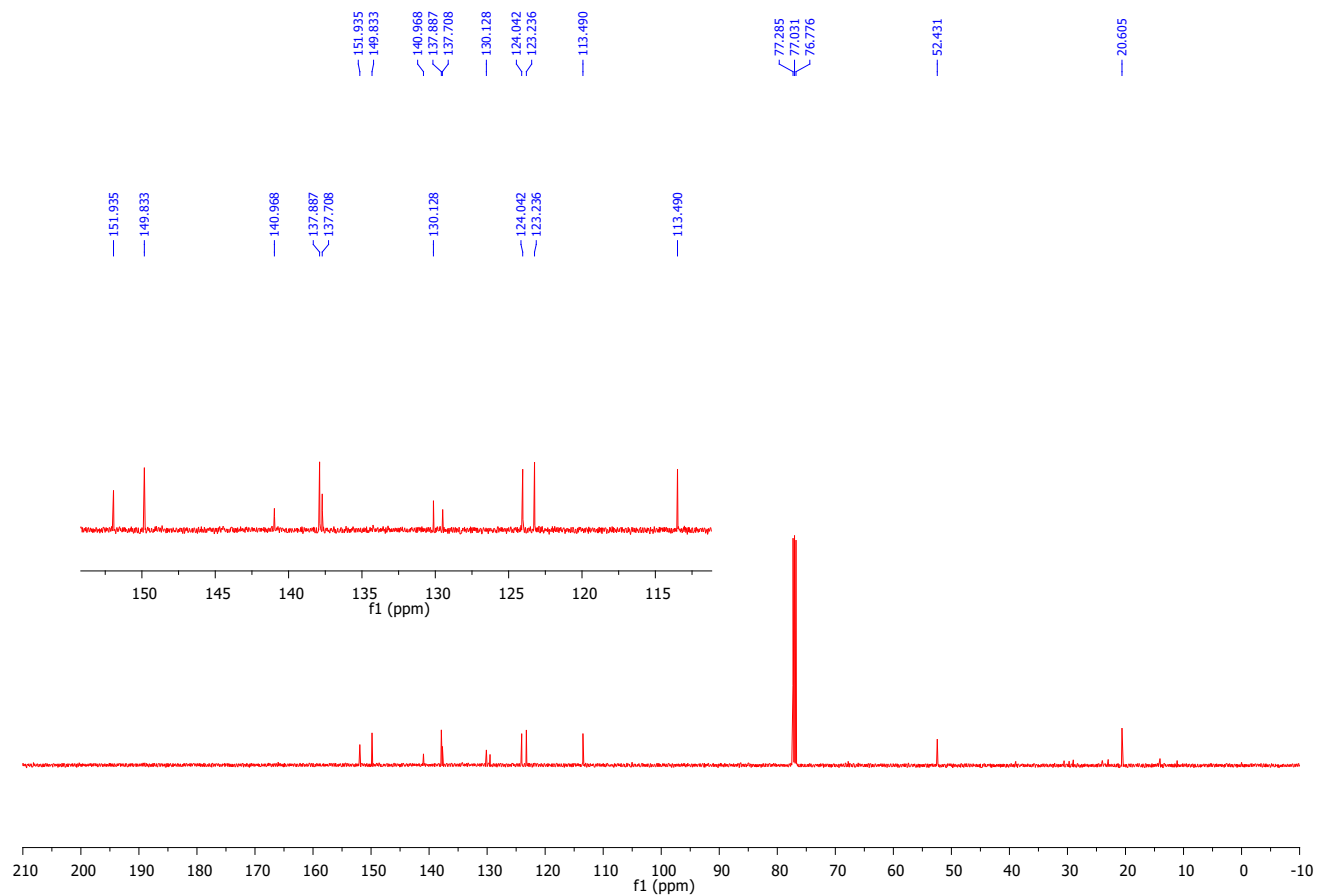

**Figure S12:**  $^{13}\text{C}$  NMR of compound **3a**

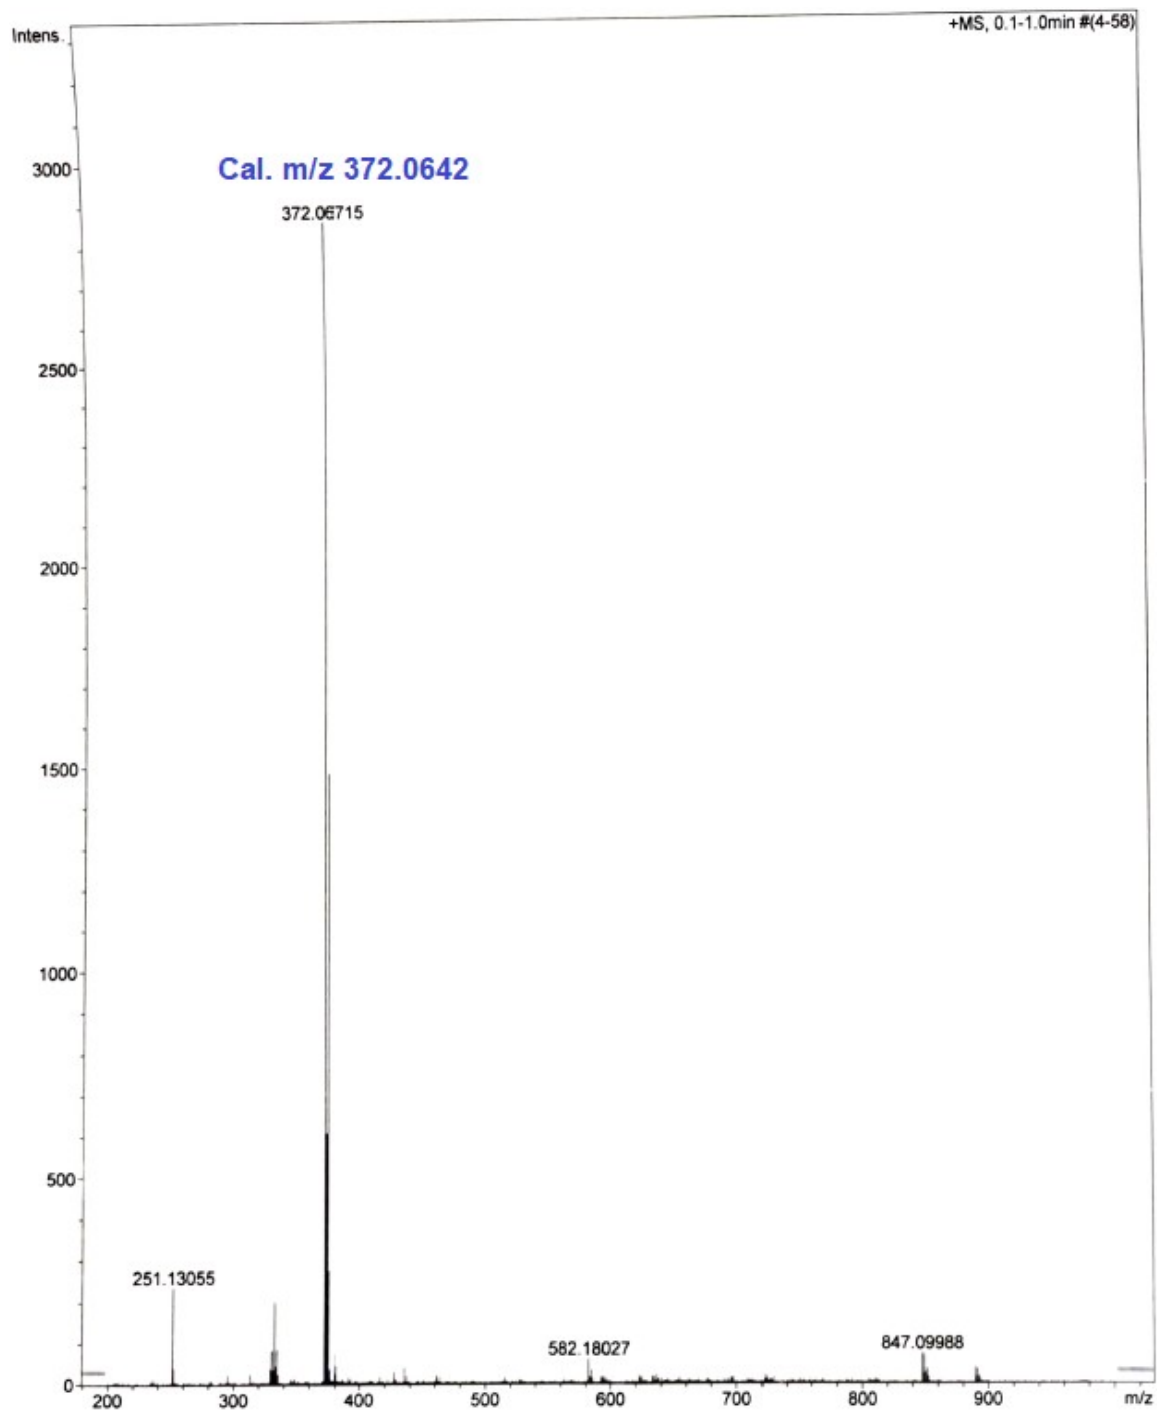

**Figure S13:** ESI-MS of complex **1b** in CH<sub>3</sub>CN solution (TNHC1= tridentate ligand **1** moiety).



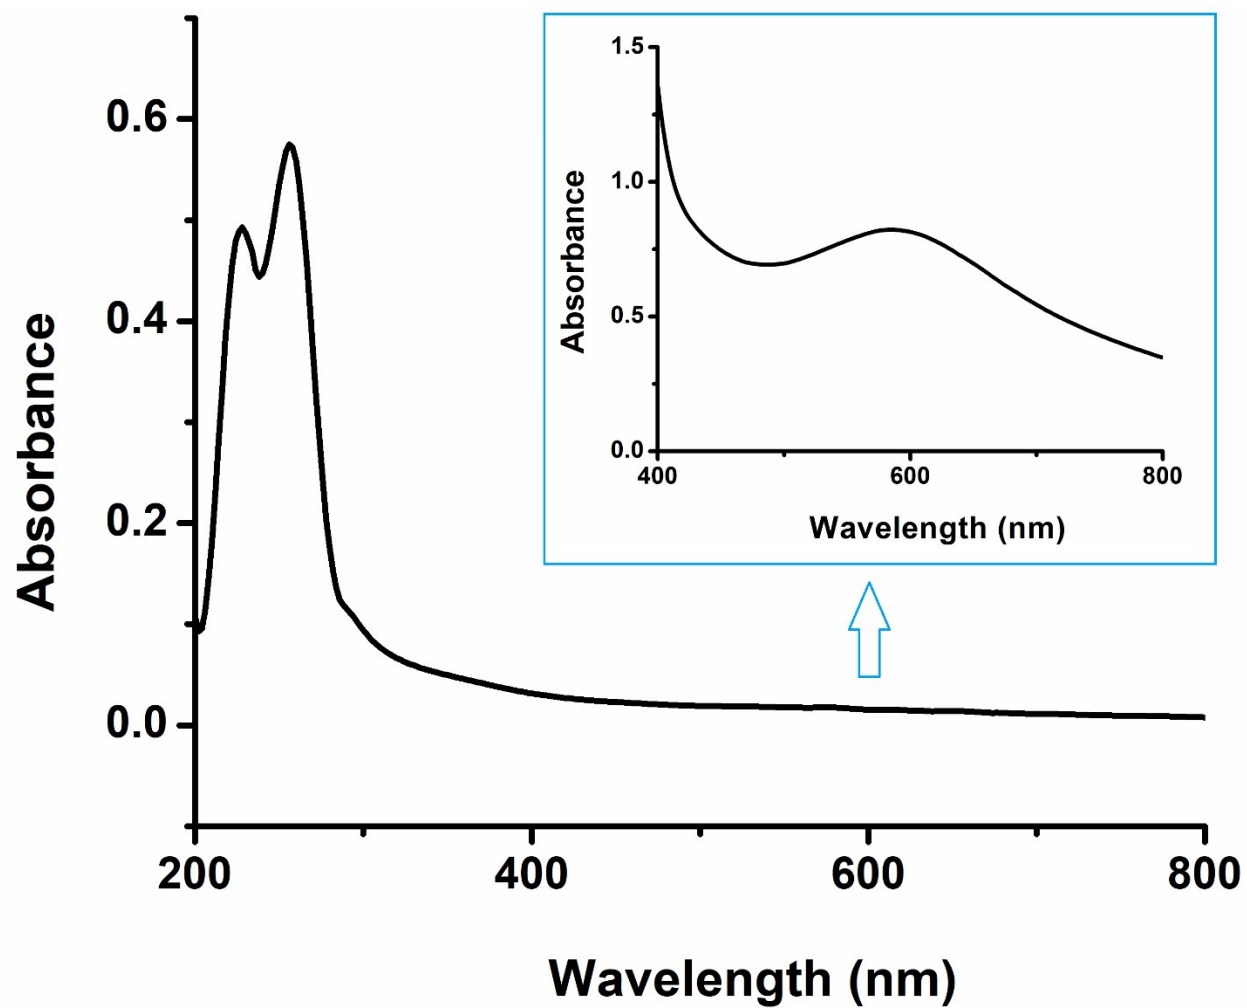

**Figure S14:** UV-Vis absorption spectra of complex **1b** in CH<sub>3</sub>CN. (conc:  $5 \times 10^{-5}$  M; Inset conc:  $5 \times 10^{-3}$  M).

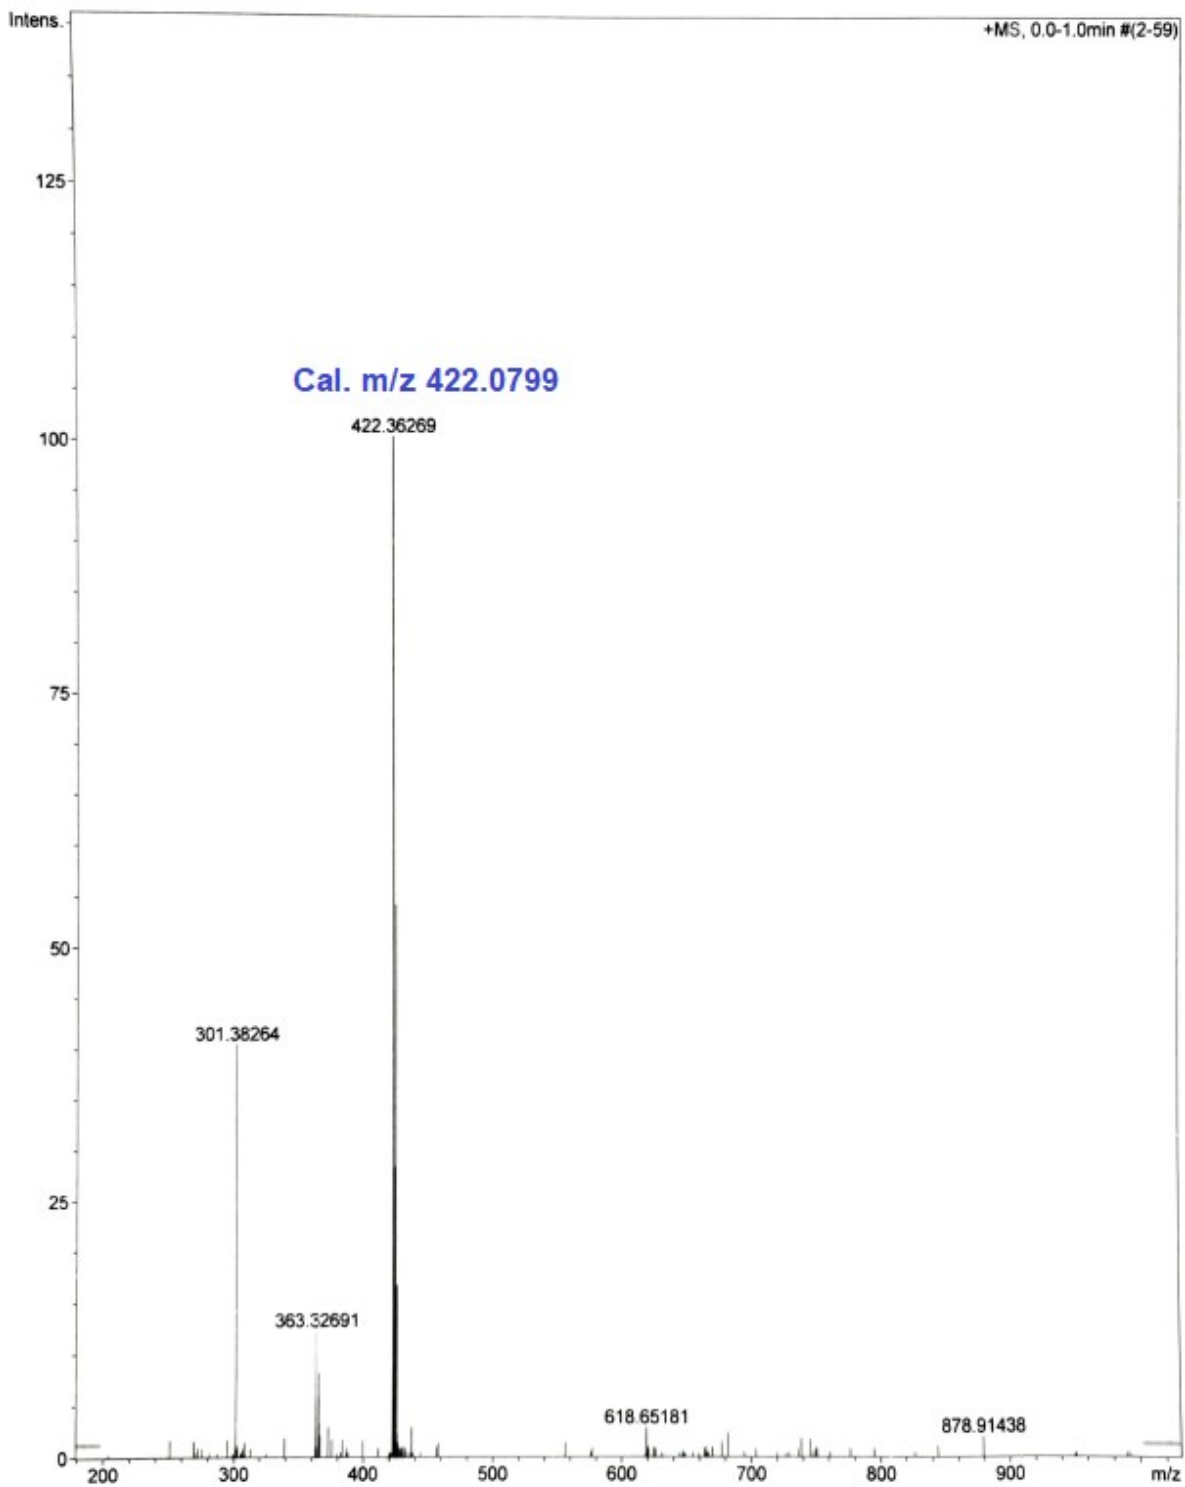

**Figure S15:** ESI-MS of complex **2b** in CH<sub>3</sub>CN solution (TNHC2= tridentate ligand **2** moiety).

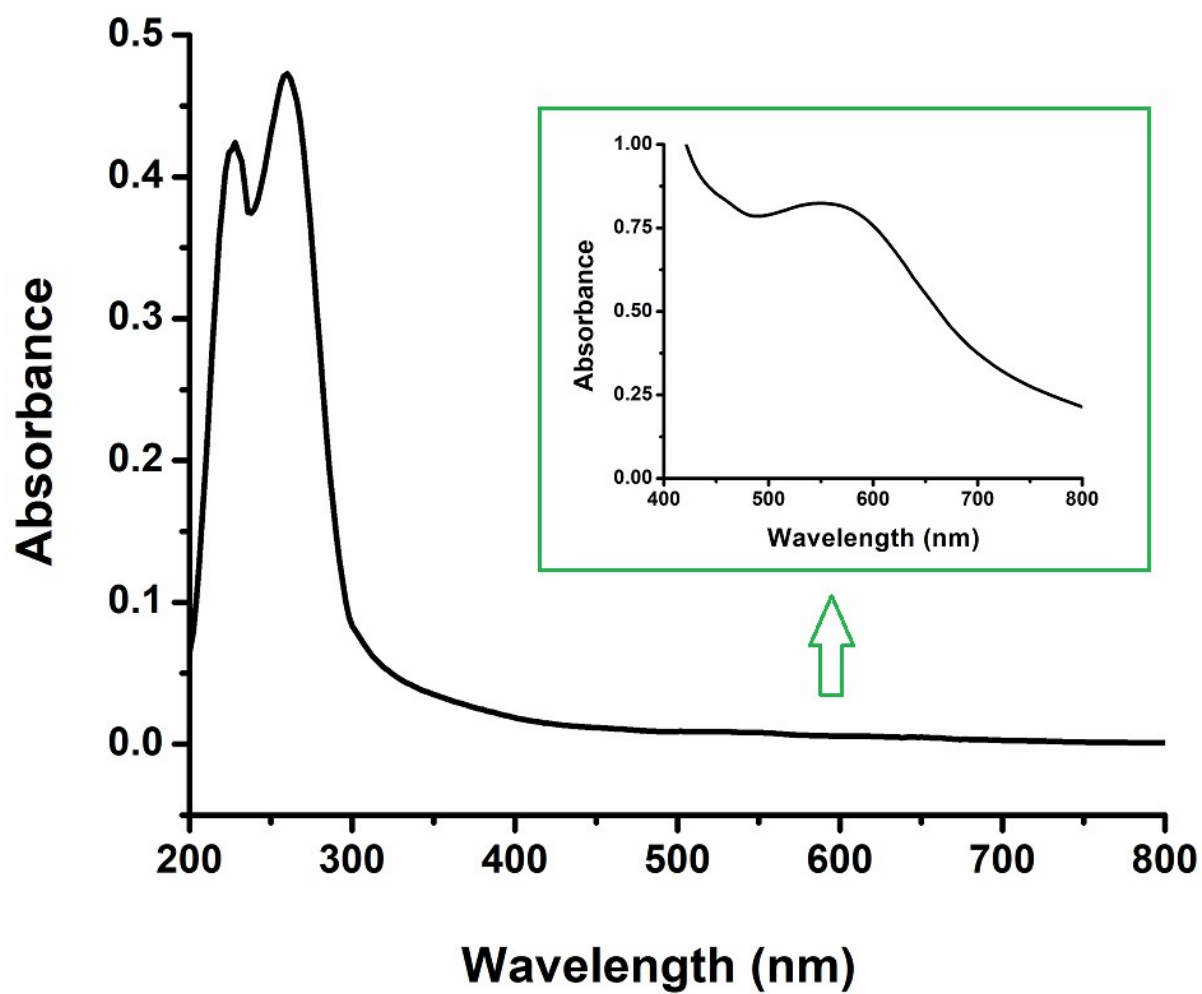

**Figure S16:** UV-Vis absorption spectra of complex **2b** in  $\text{CH}_3\text{CN}$ . (conc:  $5 \times 10^{-5}$  M; Inset conc:  $5 \times 10^{-3}$  M).

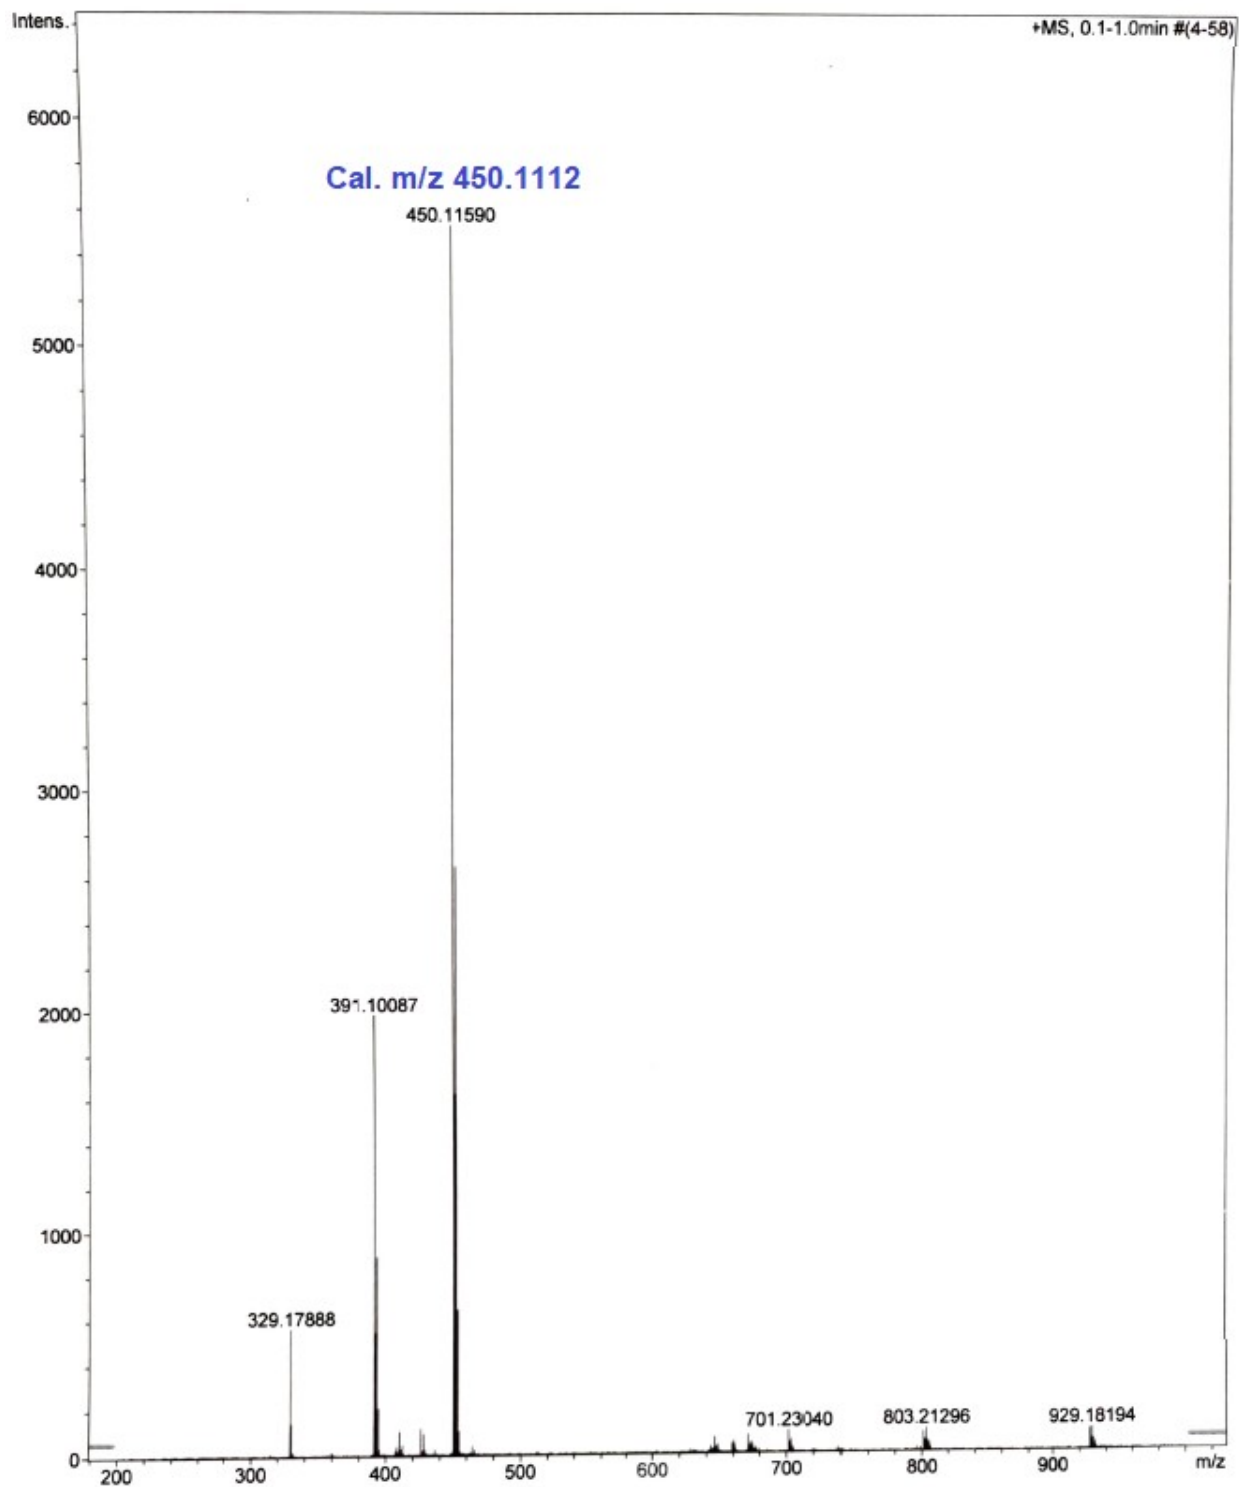

**Figure S17:** ESI-MS of complex **3b** in CH<sub>3</sub>CN solution (TNHC3= tridentate ligand **3** moiety).

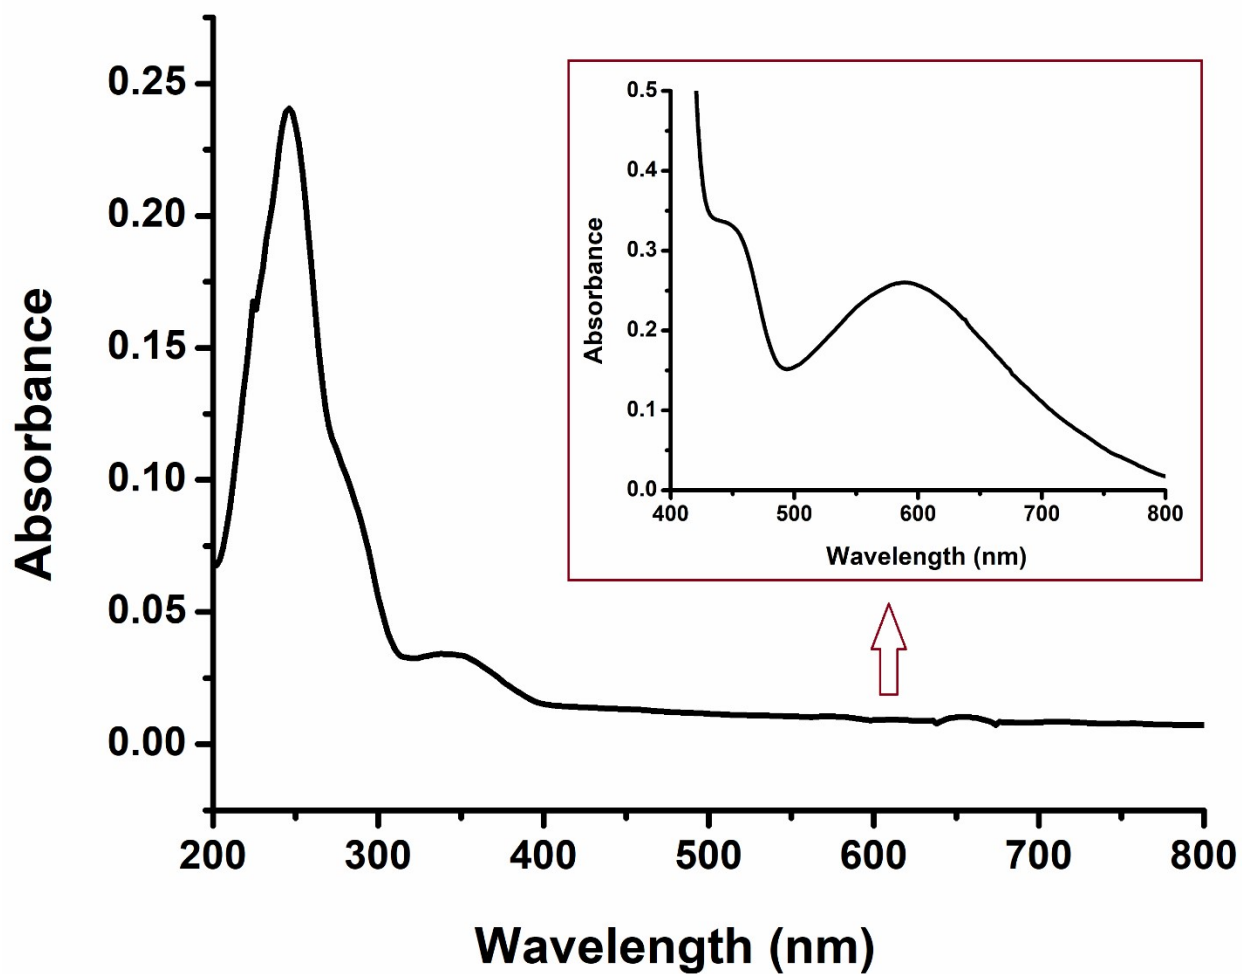

**Figure S18:** UV-Vis absorption spectra of complex **3b** in CH<sub>3</sub>CN. (conc:  $5 \times 10^{-5}$  M; Inset conc:  $5 \times 10^{-3}$  M).

## Crystal Structure Report for 1b

A green platelet like single crystal of  $C_{17}H_{17}CuF_6N_4O_2P$ , approximate dimensions (0.022 x 0.043 x 0.080) mm<sup>3</sup>, was selected for the X-ray crystallographic analysis and mounted on a cryoloop using an oil cryoprotectant. The X-ray intensity data was measured at low temperature ( $T = 100K$ ), using a three circles goniometer Kappa geometry with a fixed Kappa angle at = 54.74 deg Bruker AXS D8 Venture, equipped with a Photon 100 CMOS active pixel sensor detector. A monochromatized Cu X-ray radiation ( $\lambda = 1.54178 \text{ \AA}$ ) was selected for the measurement. All frames were integrated with the aid of the Bruker SAINT software<sup>54</sup> using a narrow-frame algorithm. The integration of the data using a monoclinic unit cell yielded a total of 23796 reflections to a maximum  $\theta$  angle of 74.49° (0.80 Å resolution), of which 4057 were independent (average redundancy 5.865, completeness = 99.5%,  $R_{int} = 8.17\%$ ,  $R_{sig} = 4.72\%$ ) and 3172 (78.19%) were greater than  $2\sigma(F^2)$ . The final cell constants of  $a = 13.0314(3) \text{ \AA}$ ,  $b = 17.4564(4) \text{ \AA}$ ,  $c = 9.0216(2) \text{ \AA}$ ,  $\beta = 103.6770(14)^\circ$ , volume = 1994.05(8) Å<sup>3</sup>, are based upon the refinement of the XYZ-centroids of 1866 reflections above  $20 \sigma(I)$  with  $6.981^\circ < 2\theta < 157.6^\circ$ . Data were corrected for absorption effects using the Multi-Scan method: (SADABS).<sup>5</sup> The ratio of minimum to maximum apparent transmission was 0.832. The calculated minimum and maximum transmission coefficients (based on crystal size) are 0.7930 and 0.9360. Structure was solved in a monoclinic unit cell; Space group: P 1 2(1)/c 1, with Z = 4 for the formula unit,  $C_{17}H_{17}CuF_6N_4O_2P$ . Using the Bruker SHELXT Software Package,<sup>6</sup> refinement of the structure was carried out by least squares procedures on weighted  $F^2$  values using the SHELXTL-2018/3<sup>7</sup> included in the APEX4 v2021, 4.0, AXS Bruker program.<sup>58</sup> Hydrogen atoms were localized on difference Fourier maps but then introduced in the refinement as fixed contributors in idealized geometry with an isotropic thermal parameters fixed at 20 % higher than those carbons atoms they were connected. The final anisotropic full-matrix least-squares refinement on  $F^2$  with 282 variables converged at  $R1 = 5.68\%$ , for the observed data and  $wR2 = 11.26\%$  for all data. The goodness-of-fit: GOF was 1.099. The largest peak in the final difference electron density synthesis was  $0.738 \text{ e}/\text{\AA}^3$  and the largest hole was  $-0.403 \text{ e}/\text{\AA}^3$  with an RMS deviation of  $0.095 \text{ e}/\text{\AA}^3$ . Based on the final model, the calculated density was  $1.725 \text{ g}/\text{cm}^3$  and F (000), 1044 e<sup>-</sup>. Graphics were performed using softwares: Mercury V.4.2.0: (<https://www.ccdc.cam.ac.uk/>) and POV-Ray v 3.7: (The Persistence of Vision Raytracer, high quality, Free Software tool).

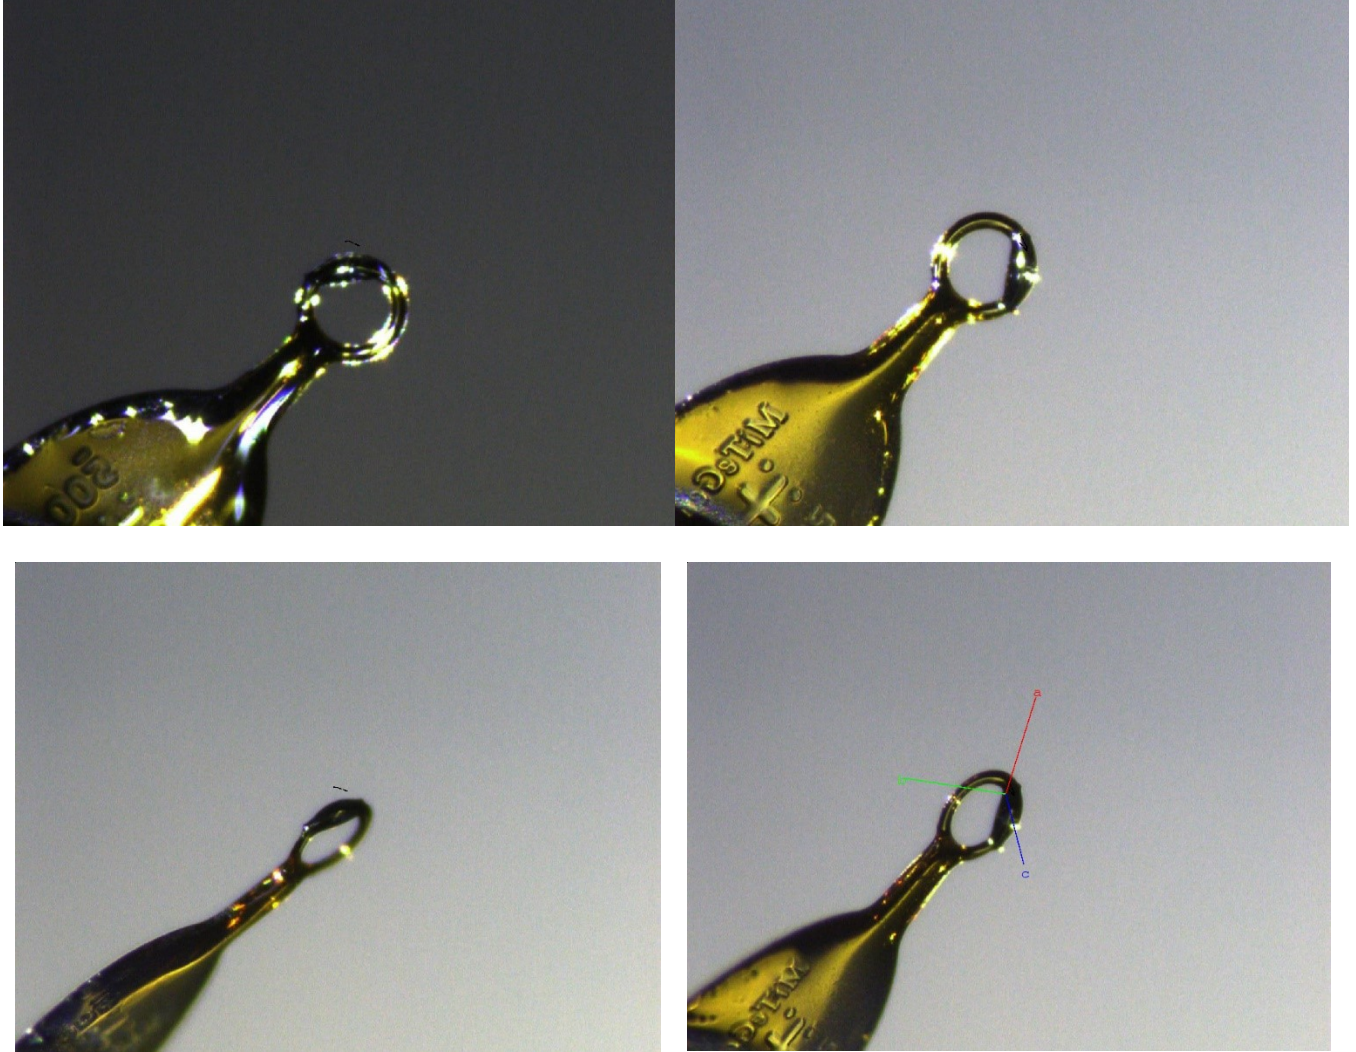

*Figure - Crystal views*

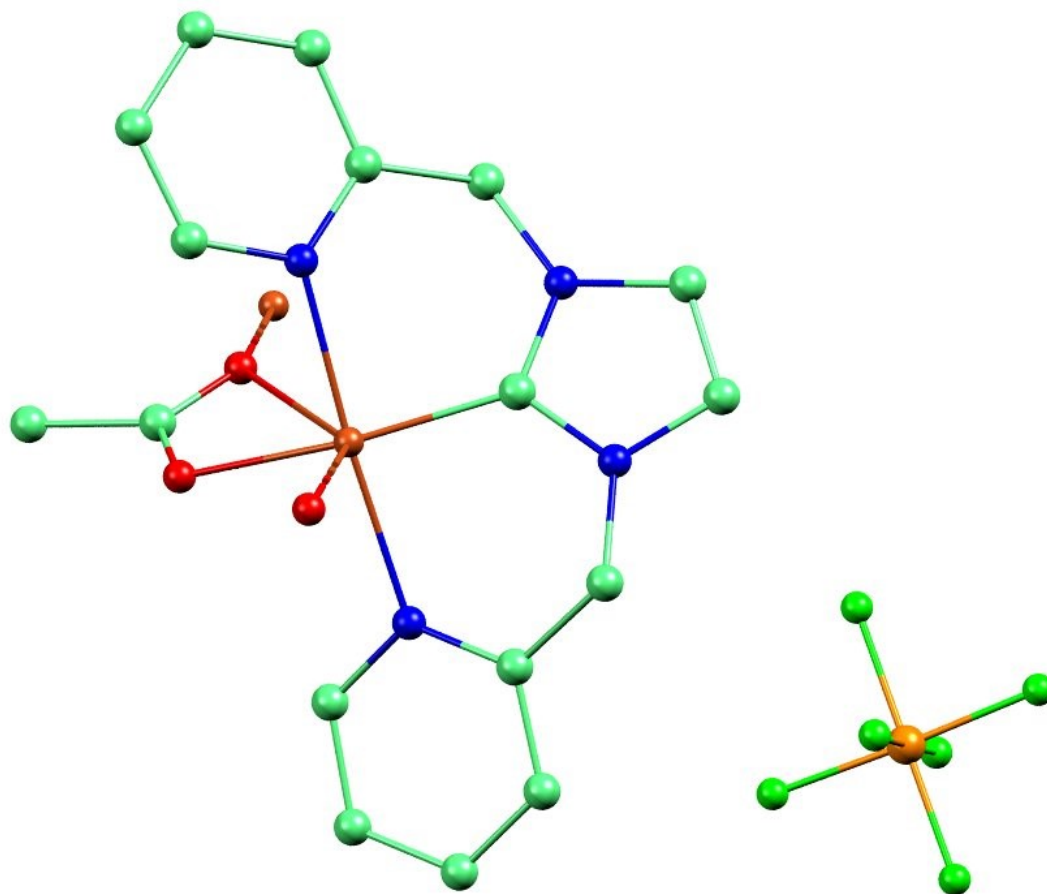

*Figure - Asymmetric unit*



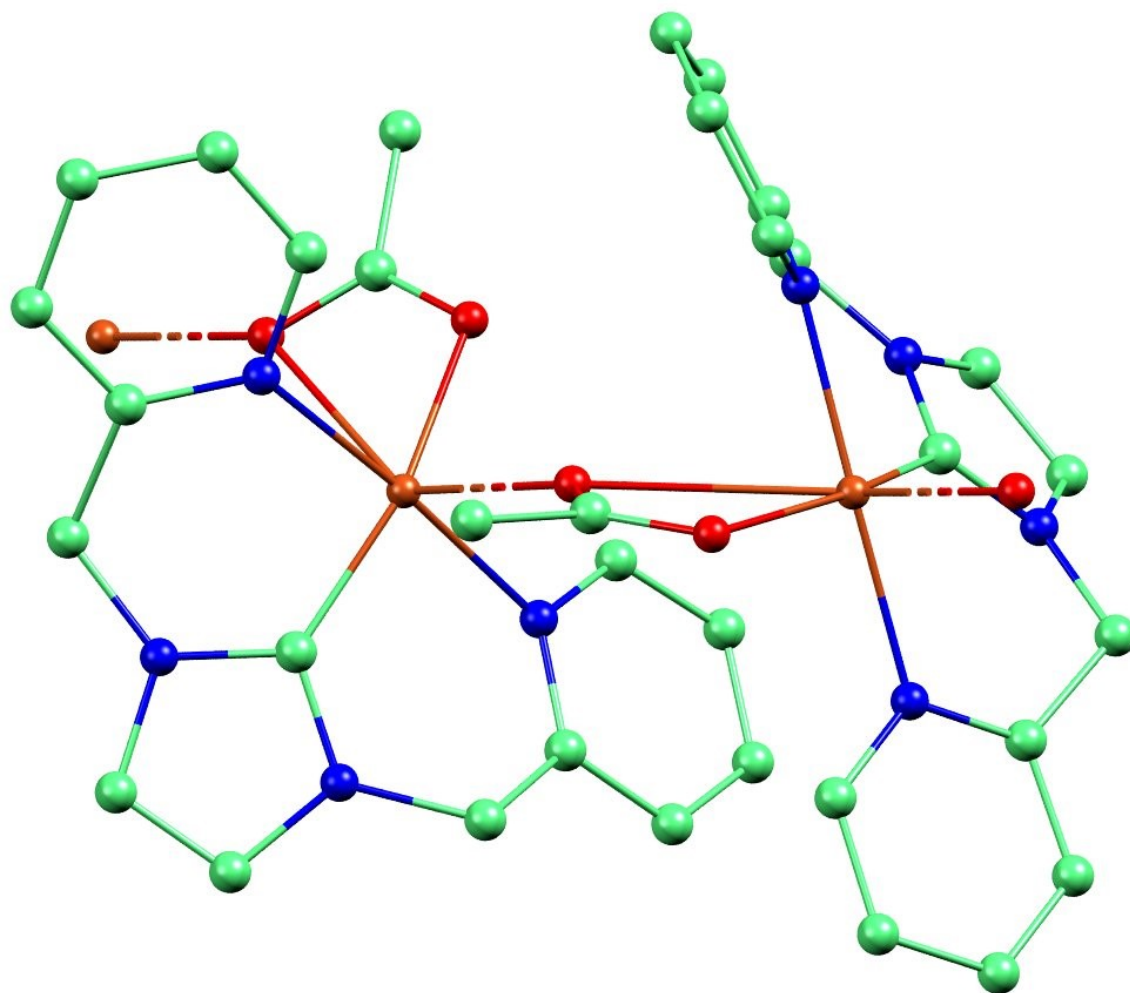

*Figure - Acetate bridge*

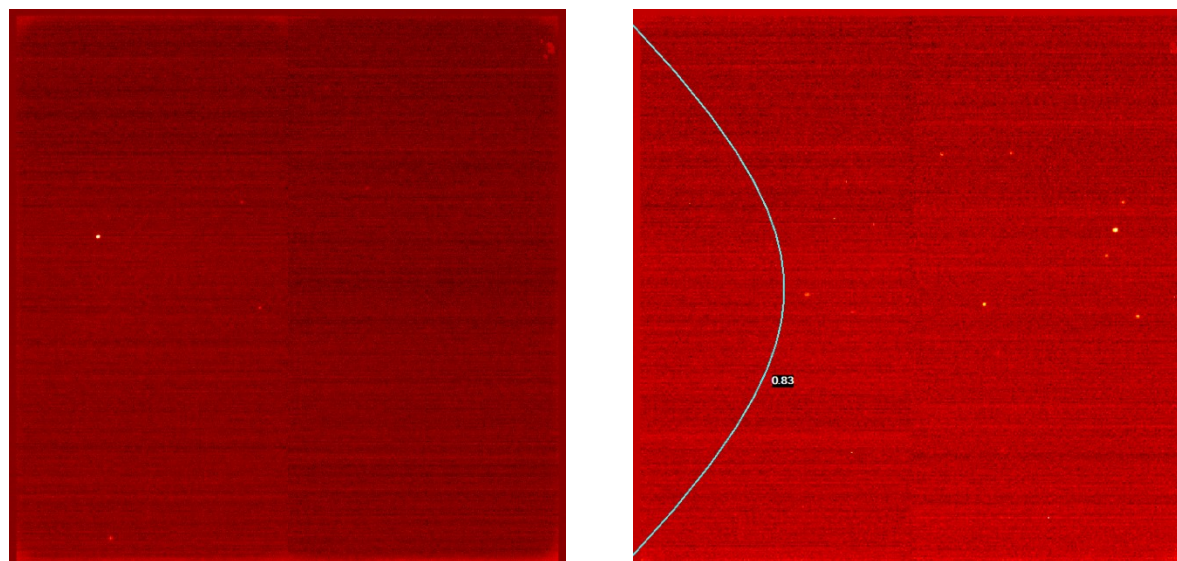

*Figure- Frames:*

*Table S1. Sample and crystal data for 1b.*

---

|                               |                                         |                              |
|-------------------------------|-----------------------------------------|------------------------------|
| <b>Identification code</b>    | 1b                                      |                              |
| <b>Chemical formula</b>       | $C_{17}H_{17}CuF_6N_4O_2P$              |                              |
| <b>Formula weight</b>         | 517.85 g/mol                            |                              |
| <b>Temperature</b>            | 100(2) K                                |                              |
| <b>Wavelength</b>             | 1.54178 Å                               |                              |
| <b>Crystal size</b>           | (0.022 x 0.043 x 0.080) mm <sup>3</sup> |                              |
| <b>Crystal system</b>         | monoclinic                              |                              |
| <b>Space group</b>            | P 1 2(1)/c 1                            |                              |
| <b>Unit cell dimensions</b>   | a = 13.0314(3) Å                        | $\alpha = 90^\circ$          |
|                               | b = 17.4564(4) Å                        | $\beta = 103.6770(14)^\circ$ |
|                               | c = 9.0216(2) Å                         | $\gamma = 90^\circ$          |
| <b>Volume</b>                 | 1994.05(8) Å <sup>3</sup>               |                              |
| <b>Z</b>                      | 4                                       |                              |
| <b>Density (calculated)</b>   | 1.725 g/cm <sup>3</sup>                 |                              |
| <b>Absorption coefficient</b> | 3.045 mm <sup>-1</sup>                  |                              |

**Table S2. Data collection and structure refinement for 1b.**


---

|                                            |                                             |                           |
|--------------------------------------------|---------------------------------------------|---------------------------|
| <b>Theta range for data collection</b>     | 3.49 to 74.49°                              |                           |
| <b>Index ranges</b>                        | -16<=h<=16, -21<=k<=21, -10<=l<=11          |                           |
| <b>Reflections collected</b>               | 23796                                       |                           |
| <b>Independent reflections</b>             | 4057 [R(int) = 0.0817]                      |                           |
| <b>Coverage of independent reflections</b> | 99.5%                                       |                           |
| <b>Absorption correction</b>               | Multi-Scan                                  |                           |
| <b>Max. and min. transmission</b>          | 0.9360 and 0.7930                           |                           |
| <b>Structure solution technique</b>        | direct methods                              |                           |
| <b>Structure solution program</b>          | XT, VERSION 2014/5                          |                           |
| <b>Refinement method</b>                   | Full-matrix least-squares on F <sup>2</sup> |                           |
| <b>Refinement program</b>                  | SHELXL-2018/3 (Sheldrick, 2018)             |                           |
| <b>Function minimized</b>                  | $\Sigma w(F_o^2 - F_c^2)^2$                 |                           |
| <b>Data / restraints / parameters</b>      | 4057 / 0 / 282                              |                           |
| <b>Goodness-of-fit on F<sup>2</sup></b>    | 1.099                                       |                           |
| <b>Final R indices</b>                     | 3172 data;                                  | R1 = 0.0568, wR2 = 0.1017 |
|                                            | I > 2σ(I)                                   |                           |
|                                            | all data                                    | R1 = 0.0814, wR2 = 0.1126 |
| <b>Weighting scheme</b>                    | $w = 1 / [\sigma^2(F_o^2) + 8.2561P]$       |                           |
|                                            | where $P = (F_o^2 + 2F_c^2) / 3$            |                           |
| <b>Largest diff. peak and hole</b>         | 0.738 and -0.403 eÅ <sup>-3</sup>           |                           |
| <b>R.M.S. deviation from mean</b>          | 0.095 eÅ <sup>-3</sup>                      |                           |

**Table S3. Atomic coordinates and equivalent isotropic atomic displacement parameters (Å<sup>2</sup>) for 1b.**


---

*U(eq)* is defined as one third of the trace of the

*orthogonalized  $U_{ij}$  tensor.*

|     | <b>x/a</b> | <b>y/b</b>  | <b>z/c</b>  | <b>U(eq)</b> |
|-----|------------|-------------|-------------|--------------|
| Cu1 | 0.18235(4) | 0.28742(3)  | 0.67082(6)  | 0.01494(16)  |
| N1  | 0.0410(2)  | 0.33250(18) | 0.5469(3)   | 0.0175(7)    |
| N2  | 0.2175(3)  | 0.43563(18) | 0.5398(3)   | 0.0167(7)    |
| N3  | 0.3315(3)  | 0.24788(19) | 0.7925(4)   | 0.0186(7)    |
| N4  | 0.3335(2)  | 0.41344(18) | 0.7458(4)   | 0.0179(7)    |
| C1  | 0.9524(3)  | 0.2961(2)   | 0.5619(5)   | 0.0203(8)    |
| C2  | 0.8556(3)  | 0.3079(2)   | 0.4635(5)   | 0.0254(9)    |
| C3  | 0.8481(3)  | 0.3599(3)   | 0.3461(5)   | 0.0272(9)    |
| C4  | 0.9369(3)  | 0.3998(2)   | 0.3345(5)   | 0.0232(9)    |
| C5  | 0.0331(3)  | 0.3851(2)   | 0.4357(4)   | 0.0170(8)    |
| C6  | 0.1298(3)  | 0.4247(2)   | 0.4073(4)   | 0.0191(8)    |
| C7  | 0.2882(3)  | 0.4959(2)   | 0.5590(5)   | 0.0204(8)    |
| C8  | 0.3611(3)  | 0.4824(2)   | 0.6903(5)   | 0.0228(9)    |
| C9  | 0.2460(3)  | 0.3853(2)   | 0.6543(4)   | 0.0178(8)    |
| C10 | 0.3836(3)  | 0.3784(2)   | 0.8918(4)   | 0.0234(9)    |
| C11 | 0.4024(3)  | 0.2930(2)   | 0.8846(4)   | 0.0201(8)    |
| C12 | 0.4915(3)  | 0.2629(3)   | 0.9836(5)   | 0.0291(10)   |
| C13 | 0.5087(4)  | 0.1849(3)   | 0.9870(6)   | 0.0357(11)   |
| C14 | 0.4378(3)  | 0.1387(3)   | 0.8905(5)   | 0.0301(10)   |
| C15 | 0.3504(3)  | 0.1717(2)   | 0.7937(5)   | 0.0214(8)    |
| O1  | 0.1252(2)  | 0.18312(14) | 0.6229(3)   | 0.0166(5)    |
| O2  | 0.1438(2)  | 0.21544(16) | 0.3936(3)   | 0.0200(6)    |
| C16 | 0.1124(3)  | 0.1693(2)   | 0.4800(4)   | 0.0161(8)    |
| C17 | 0.0559(3)  | 0.0973(2)   | 0.4195(5)   | 0.0225(8)    |
| P1  | 0.70589(8) | 0.42517(6)  | 0.87247(12) | 0.0235(2)    |
| F1  | 0.6039(2)  | 0.44425(18) | 0.7386(4)   | 0.0486(8)    |
| F2  | 0.6397(3)  | 0.4436(2)   | 0.9958(4)   | 0.0592(10)   |
| F3  | 0.8071(2)  | 0.4058(2)   | 0.0014(3)   | 0.0585(9)    |
| F4  | 0.7705(2)  | 0.40664(19) | 0.7471(3)   | 0.0474(8)    |
| F5  | 0.7399(3)  | 0.51221(18) | 0.8692(5)   | 0.0651(10)   |
| F6  | 0.6688(3)  | 0.33882(17) | 0.8676(4)   | 0.0556(9)    |

**Table S4. Bond lengths (Å) for 1b.**

|          |          |          |          |
|----------|----------|----------|----------|
| Cu1-C9   | 1.920(4) | Cu1-O1   | 1.976(3) |
| Cu1-N1   | 2.071(3) | Cu1-N3   | 2.109(3) |
| Cu1-O2#1 | 2.184(2) | N1-C5    | 1.346(5) |
| N1-C1    | 1.352(5) | N2-C9    | 1.340(5) |
| N2-C7    | 1.383(5) | N2-C6    | 1.457(5) |
| N3-C11   | 1.342(5) | N3-C15   | 1.351(5) |
| N4-C9    | 1.333(5) | N4-C8    | 1.384(5) |
| N4-C10   | 1.459(5) | C1-C2    | 1.376(6) |
| C1-H1    | 0.950000 | C2-C3    | 1.381(6) |
| C2-H2    | 0.950000 | C3-C4    | 1.375(6) |
| C3-H3    | 0.950000 | C4-C5    | 1.388(5) |
| C4-H4    | 0.950000 | C5-C6    | 1.512(5) |
| C6-H6A   | 0.990000 | C6-H6B   | 0.990000 |
| C7-C8    | 1.352(6) | C7-H7    | 0.950000 |
| C8-H8    | 0.950000 | C10-C11  | 1.516(6) |
| C10-H10A | 0.990000 | C10-H10B | 0.990000 |
| C11-C12  | 1.390(6) | C12-C13  | 1.379(7) |
| C12-H12  | 0.950000 | C13-C14  | 1.372(7) |
| C13-H13  | 0.950000 | C14-C15  | 1.386(6) |
| C14-H14  | 0.950000 | C15-H15  | 0.950000 |
| O1-C16   | 1.283(4) | O2-C16   | 1.254(4) |
| C16-C17  | 1.493(5) | C17-H17A | 0.980000 |
| C17-H17B | 0.980000 | C17-H17C | 0.980000 |
| P1-F3    | 1.576(3) | P1-F6    | 1.580(3) |
| P1-F5    | 1.585(3) | P1-F2    | 1.594(3) |
| P1-F4    | 1.594(3) | P1-F1    | 1.605(3) |

Symmetry transformations used to generate equivalent atoms:

#1  $x, -y+1/2, z+1/2$

**Table S5. Bond angles (°) for 1b.**

|              |            |               |            |
|--------------|------------|---------------|------------|
| C9-Cu1-O1    | 161.83(13) | C9-Cu1-N1     | 88.03(15)  |
| O1-Cu1-N1    | 89.46(12)  | C9-Cu1-N3     | 88.26(15)  |
| O1-Cu1-N3    | 93.77(12)  | N1-Cu1-N3     | 176.17(13) |
| C9-Cu1-O2#2  | 106.82(13) | O1-Cu1-O2#2   | 91.34(10)  |
| N1-Cu1-O2#2  | 97.85(11)  | N3-Cu1-O2#2   | 84.14(11)  |
| C5-N1-C1     | 118.6(3)   | C5-N1-Cu1     | 124.3(3)   |
| C1-N1-Cu1    | 116.0(3)   | C9-N2-C7      | 110.3(3)   |
| C9-N2-C6     | 124.6(3)   | C7-N2-C6      | 124.9(3)   |
| C11-N3-C15   | 118.3(4)   | C11-N3-Cu1    | 123.0(3)   |
| C15-N3-Cu1   | 118.0(3)   | C9-N4-C8      | 110.8(3)   |
| C9-N4-C10    | 122.6(3)   | C8-N4-C10     | 126.3(3)   |
| N1-C1-C2     | 122.6(4)   | N1-C1-H1      | 118.700000 |
| C2-C1-H1     | 118.700000 | C1-C2-C3      | 118.7(4)   |
| C1-C2-H2     | 120.600000 | C3-C2-H2      | 120.600000 |
| C4-C3-C2     | 118.9(4)   | C4-C3-H3      | 120.600000 |
| C2-C3-H3     | 120.600000 | C3-C4-C5      | 120.1(4)   |
| C3-C4-H4     | 119.900000 | C5-C4-H4      | 119.900000 |
| N1-C5-C4     | 120.9(4)   | N1-C5-C6      | 121.2(3)   |
| C4-C5-C6     | 117.6(3)   | N2-C6-C5      | 116.4(3)   |
| N2-C6-H6A    | 108.200000 | C5-C6-H6A     | 108.200000 |
| N2-C6-H6B    | 108.200000 | C5-C6-H6B     | 108.200000 |
| H6A-C6-H6B   | 107.300000 | C8-C7-N2      | 106.6(3)   |
| C8-C7-H7     | 126.700000 | N2-C7-H7      | 126.700000 |
| C7-C8-N4     | 106.2(3)   | C7-C8-H8      | 126.900000 |
| N4-C8-H8     | 126.900000 | N4-C9-N2      | 106.0(3)   |
| N4-C9-Cu1    | 127.0(3)   | N2-C9-Cu1     | 126.7(3)   |
| N4-C10-C11   | 114.6(3)   | N4-C10-H10A   | 108.600000 |
| C11-C10-H10A | 108.600000 | N4-C10-H10B   | 108.600000 |
| C11-C10-H10B | 108.600000 | H10A-C10-H10B | 107.600000 |
| N3-C11-C12   | 121.7(4)   | N3-C11-C10    | 120.6(3)   |
| C12-C11-C10  | 117.6(4)   | C13-C12-C11   | 119.6(4)   |

|               |            |               |            |
|---------------|------------|---------------|------------|
| C13-C12-H12   | 120.200000 | C11-C12-H12   | 120.200000 |
| C14-C13-C12   | 119.0(4)   | C14-C13-H13   | 120.500000 |
| C12-C13-H13   | 120.500000 | C13-C14-C15   | 119.1(4)   |
| C13-C14-H14   | 120.500000 | C15-C14-H14   | 120.500000 |
| N3-C15-C14    | 122.3(4)   | N3-C15-H15    | 118.800000 |
| C14-C15-H15   | 118.800000 | C16-O1-Cu1    | 110.2(2)   |
| C16-O2-Cu1#1  | 137.5(2)   | O2-C16-O1     | 121.3(3)   |
| O2-C16-C17    | 121.2(3)   | O1-C16-C17    | 117.4(3)   |
| C16-C17-H17A  | 109.500000 | C16-C17-H17B  | 109.500000 |
| H17A-C17-H17B | 109.500000 | C16-C17-H17C  | 109.500000 |
| H17A-C17-H17C | 109.500000 | H17B-C17-H17C | 109.500000 |
| F3-P1-F6      | 90.7(2)    | F3-P1-F5      | 91.8(2)    |
| F6-P1-F5      | 177.3(2)   | F3-P1-F2      | 91.40(19)  |
| F6-P1-F2      | 89.98(19)  | F5-P1-F2      | 91.1(2)    |
| F3-P1-F4      | 89.43(17)  | F6-P1-F4      | 89.75(18)  |
| F5-P1-F4      | 89.10(19)  | F2-P1-F4      | 179.13(18) |
| F3-P1-F1      | 178.86(19) | F6-P1-F1      | 89.08(18)  |
| F5-P1-F1      | 88.42(19)  | F2-P1-F1      | 89.72(18)  |
| F4-P1-F1      | 89.45(16)  |               |            |

Symmetry transformations used to generate equivalent atoms:

#1  $x, -y+1/2, z-1/2$

#2  $x, -y+1/2, z+1/2$

**Table S6. Torsion angles (°) for 1b.**

---

|              |          |              |           |
|--------------|----------|--------------|-----------|
| C5-N1-C1-C2  | 3.3(6)   | Cu1-N1-C1-C2 | -165.2(3) |
| N1-C1-C2-C3  | -1.1(6)  | C1-C2-C3-C4  | -2.0(6)   |
| C2-C3-C4-C5  | 2.8(6)   | C1-N1-C5-C4  | -2.5(5)   |
| Cu1-N1-C5-C4 | 165.0(3) | C1-N1-C5-C6  | -176.6(3) |
| Cu1-N1-C5-C6 | -9.1(5)  | C3-C4-C5-N1  | -0.6(6)   |

|                  |           |                 |           |
|------------------|-----------|-----------------|-----------|
| C3-C4-C5-C6      | 173.8(4)  | C9-N2-C6-C5     | 36.7(5)   |
| C7-N2-C6-C5      | -149.2(3) | N1-C5-C6-N2     | -30.6(5)  |
| C4-C5-C6-N2      | 155.0(3)  | C9-N2-C7-C8     | -0.9(4)   |
| C6-N2-C7-C8      | -175.8(3) | N2-C7-C8-N4     | 1.0(4)    |
| C9-N4-C8-C7      | -0.8(4)   | C10-N4-C8-C7    | -174.4(3) |
| C8-N4-C9-N2      | 0.2(4)    | C10-N4-C9-N2    | 174.1(3)  |
| C8-N4-C9-Cu1     | 174.2(3)  | C10-N4-C9-Cu1   | -12.0(5)  |
| C7-N2-C9-N4      | 0.4(4)    | C6-N2-C9-N4     | 175.3(3)  |
| C7-N2-C9-Cu1     | -173.5(3) | C6-N2-C9-Cu1    | 1.3(5)    |
| C9-N4-C10-C11    | 50.2(5)   | C8-N4-C10-C11   | -137.0(4) |
| C15-N3-C11-C12   | -2.4(5)   | Cu1-N3-C11-C12  | 168.4(3)  |
| C15-N3-C11-C10   | -178.0(3) | Cu1-N3-C11-C10  | -7.3(5)   |
| N4-C10-C11-N3    | -37.5(5)  | N4-C10-C11-C12  | 146.7(4)  |
| N3-C11-C12-C13   | 0.7(6)    | C10-C11-C12-C13 | 176.5(4)  |
| C11-C12-C13-C14  | 0.8(7)    | C12-C13-C14-C15 | -0.6(7)   |
| C11-N3-C15-C14   | 2.6(6)    | Cu1-N3-C15-C14  | -168.6(3) |
| C13-C14-C15-N3   | -1.1(6)   | Cu1#1-O2-C16-O1 | 159.8(3)  |
| Cu1#1-O2-C16-C17 | -22.0(6)  | Cu1-O1-C16-O2   | 6.5(4)    |
| Cu1-O1-C16-C17   | -171.7(3) |                 |           |

Symmetry transformations used to generate equivalent atoms:

#1  $x, -y+1/2, z-1/2$

**Table S7. Anisotropic atomic displacement parameters ( $\text{\AA}^2$ ) for 1b.**

The anisotropic atomic displacement factor exponent takes the form:  $-2\pi^2 [ h^2 a^{*2} U_{11} + \dots + 2 h k a^* b^* U_{12} ]$

|     | $U_{11}$   | $U_{22}$   | $U_{33}$   | $U_{23}$   | $U_{13}$   | $U_{12}$   |
|-----|------------|------------|------------|------------|------------|------------|
| Cu1 | 0.0176(3)  | 0.0163(3)  | 0.0113(3)  | 0.0022(2)  | 0.0042(2)  | 0.0008(2)  |
| N1  | 0.0203(16) | 0.0198(16) | 0.0139(15) | 0.0001(13) | 0.0068(13) | 0.0027(13) |



|     | U <sub>11</sub> | U <sub>22</sub> | U <sub>33</sub> | U <sub>23</sub> | U <sub>13</sub> | U <sub>12</sub> |
|-----|-----------------|-----------------|-----------------|-----------------|-----------------|-----------------|
| N2  | 0.0231(17)      | 0.0159(15)      | 0.0119(15)      | 0.0000(12)      | 0.0059(13)      | -0.0008(13)     |
| N3  | 0.0198(16)      | 0.0223(17)      | 0.0157(16)      | 0.0042(13)      | 0.0081(13)      | 0.0019(13)      |
| N4  | 0.0198(16)      | 0.0200(16)      | 0.0143(16)      | -0.0004(13)     | 0.0048(13)      | -0.0024(13)     |
| C1  | 0.0203(19)      | 0.0202(19)      | 0.022(2)        | 0.0012(16)      | 0.0081(16)      | 0.0037(16)      |
| C2  | 0.019(2)        | 0.032(2)        | 0.026(2)        | -0.0033(18)     | 0.0056(17)      | 0.0022(17)      |
| C3  | 0.022(2)        | 0.034(2)        | 0.024(2)        | -0.0031(18)     | 0.0018(17)      | 0.0083(18)      |
| C4  | 0.030(2)        | 0.022(2)        | 0.0155(19)      | 0.0010(16)      | 0.0017(16)      | 0.0063(17)      |
| C5  | 0.024(2)        | 0.0165(18)      | 0.0110(18)      | -0.0049(14)     | 0.0047(15)      | 0.0024(15)      |
| C6  | 0.026(2)        | 0.0192(19)      | 0.0113(18)      | -0.0008(15)     | 0.0035(15)      | 0.0005(16)      |
| C7  | 0.028(2)        | 0.0156(18)      | 0.021(2)        | -0.0019(15)     | 0.0106(17)      | -0.0012(16)     |
| C8  | 0.025(2)        | 0.022(2)        | 0.023(2)        | -0.0026(16)     | 0.0108(17)      | -0.0050(17)     |
| C9  | 0.0209(19)      | 0.0202(19)      | 0.0140(18)      | -0.0007(15)     | 0.0075(15)      | 0.0022(15)      |
| C10 | 0.025(2)        | 0.031(2)        | 0.0144(19)      | 0.0019(17)      | 0.0040(16)      | -0.0004(17)     |
| C11 | 0.0194(19)      | 0.029(2)        | 0.0142(18)      | 0.0041(16)      | 0.0081(15)      | 0.0033(17)      |
| C12 | 0.024(2)        | 0.034(2)        | 0.027(2)        | 0.0060(19)      | 0.0023(18)      | -0.0026(18)     |
| C13 | 0.023(2)        | 0.049(3)        | 0.034(3)        | 0.017(2)        | 0.0035(19)      | 0.006(2)        |
| C14 | 0.026(2)        | 0.032(2)        | 0.034(2)        | 0.015(2)        | 0.0119(19)      | 0.0074(19)      |
| C15 | 0.021(2)        | 0.023(2)        | 0.024(2)        | 0.0030(16)      | 0.0125(17)      | 0.0026(16)      |
| O1  | 0.0194(13)      | 0.0185(13)      | 0.0123(13)      | 0.0003(10)      | 0.0048(10)      | 0.0012(10)      |
| O2  | 0.0266(14)      | 0.0235(14)      | 0.0125(12)      | 0.0002(11)      | 0.0095(11)      | -0.0055(12)     |
| C16 | 0.0160(18)      | 0.0178(18)      | 0.0150(18)      | 0.0009(15)      | 0.0048(14)      | 0.0038(14)      |
| C17 | 0.027(2)        | 0.023(2)        | 0.019(2)        | 0.0000(16)      | 0.0064(17)      | -0.0030(17)     |
| P1  | 0.0212(5)       | 0.0273(6)       | 0.0220(5)       | 0.0002(4)       | 0.0052(4)       | -0.0015(4)      |
| F1  | 0.0338(16)      | 0.0546(19)      | 0.0494(18)      | -0.0064(15)     | -0.0063(13)     | 0.0116(14)      |
| F2  | 0.0518(19)      | 0.088(3)        | 0.0458(18)      | -0.0311(18)     | 0.0283(15)      | -0.0130(18)     |
| F3  | 0.0373(17)      | 0.103(3)        | 0.0270(16)      | 0.0141(17)      | -0.0080(13)     | -0.0046(17)     |
| F4  | 0.0438(17)      | 0.073(2)        | 0.0301(15)      | 0.0142(14)      | 0.0175(13)      | 0.0242(15)      |
| F5  | 0.061(2)        | 0.0356(17)      | 0.099(3)        | -0.0048(18)     | 0.020(2)        | -0.0171(16)     |
| F6  | 0.059(2)        | 0.0284(15)      | 0.082(2)        | 0.0021(16)      | 0.0223(18)      | -0.0069(14)     |

**Table S8. Hydrogen atomic coordinates and isotropic atomic displacement parameters ( $\text{\AA}^2$ ) for 1b.**

---

---

|      | <b>x/a</b> | <b>y/b</b> | <b>z/c</b> | <b>U(eq)</b> |
|------|------------|------------|------------|--------------|
| H1   | -0.0428    | 0.2610     | 0.6437     | 0.024000     |
| H2   | -0.2050    | 0.2807     | 0.4761     | 0.031000     |
| H3   | -0.2173    | 0.3680     | 0.2745     | 0.033000     |
| H4   | -0.0676    | 0.4374     | 0.2572     | 0.028000     |
| H6A  | 0.1557     | 0.3947     | 0.3305     | 0.023000     |
| H6B  | 0.1082     | 0.4756     | 0.3621     | 0.023000     |
| H7   | 0.2861     | 0.5385     | 0.4928     | 0.025000     |
| H8   | 0.4196     | 0.5139     | 0.7353     | 0.027000     |
| H10A | 0.3386     | 0.3879     | 0.9644     | 0.028000     |
| H10B | 0.4522     | 0.4040     | 0.9327     | 0.028000     |
| H12  | 0.5402     | 0.2959     | 1.0486     | 0.035000     |
| H13  | 0.5688     | 0.1635     | 1.0551     | 0.043000     |
| H14  | 0.4484     | 0.0849     | 0.8901     | 0.036000     |
| H15  | 0.3021     | 0.1397     | 0.7257     | 0.026000     |
| H17A | -0.0204    | 0.1068     | 0.3927     | 0.034000     |
| H17B | 0.0723     | 0.0572     | 0.4976     | 0.034000     |
| H17C | 0.0787     | 0.0808     | 0.3285     | 0.034000     |

**Crystal Structure Report for 3b**

A blue prism like single crystal of  $C_{24}H_{27}CuF_6N_4O_3P$ , approximate dimensions (0.107 x 0.250 x 0.636) mm<sup>3</sup>, was selected for the X-ray crystallographic analysis and mounted on a cryoloop using an oil cryoprotectant. The X-ray intensity data was measured at low temperature (T = 200K), using a three circles goniometer Kappa geometry with a fixed Kappa angle at = 54.74 deg Bruker AXS D8 Venture, equipped with a Photon 100 CMOS active pixel sensor detector. A monochromatized Cu X-ray radiation ( $\lambda = 1.54178 \text{ \AA}$ ) was selected for the measurement. All frames were integrated with the aid of the Bruker SAINT software<sup>S1</sup> using a narrow-frame algorithm. The integration of the data using a triclinic unit cell yielded a total of 29336 reflections to a maximum  $\theta$  angle of 68.24° (0.83 Å resolution), of which 4812 were independent (average redundancy 6.096, completeness = 99.0%,  $R_{int} = 3.77\%$ ,  $R_{sig} = 2.57\%$ ) and 4349 (90.38%) were greater than  $2\sigma$  ( $F^2$ ). The final cell constants of  $a = 9.4890(14) \text{ \AA}$ ,  $b = 10.9068(16) \text{ \AA}$ ,  $c = 14.481(2) \text{ \AA}$ ,  $\alpha = 111.242(6)^\circ$ ,  $\beta = 103.332(6)^\circ$ ,  $\gamma = 96.766(5)^\circ$ , volume = 1325.3(3) Å<sup>3</sup>, are based upon the refinement of the XYZ-centroids of 1302 reflections above  $20 \sigma$  (I) with  $6.854^\circ < 2\theta < 150.3^\circ$ . Data were corrected for absorption effects using the Multi-Scan method: (SADABS).<sup>S2</sup> The ratio of minimum to maximum apparent transmission was 0.787. The calculated minimum and maximum transmission coefficients (based on crystal size) are 0.3070 and 0.7810. The structure was solved and refined using the Bruker SHELXTL Software Package, using the space group P -1, with Z = 2 for the formula unit,  $C_{24}H_{26.5}CuF_6N_4O_3P$ . Using the Bruker SHELXT Software Package,<sup>S3</sup> refinement of the structure was carried out by least squares procedures on weighted  $F^2$  values using the SHELXTL-2018/3<sup>4</sup> included in the APEX4 v2021, 4.0, AXS Bruker program.<sup>S5</sup> Hydrogen atoms were localized on difference Fourier maps but then introduced in the refinement as fixed contributors in idealized geometry with an isotropic thermal parameters fixed at 20 % higher than those carbons atoms they were connected. A molecule of Methanol: CH<sub>3</sub>OH and Acetate: CH<sub>3</sub>COO<sup>-</sup> were found coordinated on a Copper center and found statistically disordered on two sites. A counter anion: PF<sub>6</sub><sup>-</sup> was also depicted crystallized with the Copper complex statistically distributed on two positions. All were anisotropically refined with a ratio of occupancy equal to 50%. Restraints were put on interatomic lengths and angles and constraints were added on ADP's parameters in order to get a chemically reasonable refined model. The final anisotropic full-matrix least-squares refinement on  $F^2$  with 474 variables converged at  $R1 = 3.63\%$ , for the observed data and  $wR2 = 9.44\%$  for all data. The goodness-of-fit: GOF was 1.061. The largest peak in the final difference electron density synthesis was 0.511 e<sup>-</sup>/Å<sup>3</sup> and the largest hole was -0.369 e<sup>-</sup>/Å<sup>3</sup> with an RMS deviation of 0.057 e<sup>-</sup>/Å<sup>3</sup>. Based on the final model, the calculated density was 1.574 g/cm<sup>3</sup> and F(000), 642 e<sup>-</sup>. Graphics were performed using softwares: Mercury V.4.2.0: (<https://www.ccdc.cam.ac.uk/>) and POV-Ray v 3.7: (The Persistence of Vision Raytracer, high quality, Free Software tool).

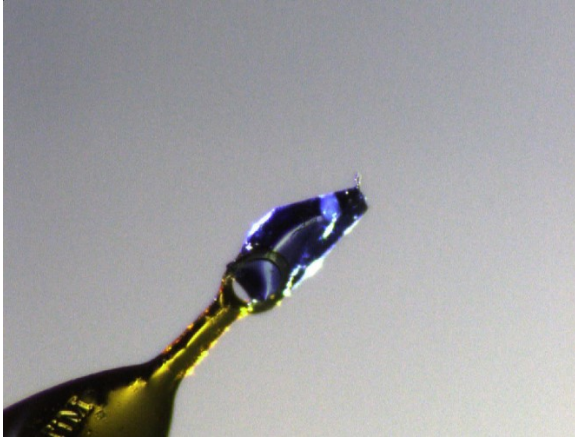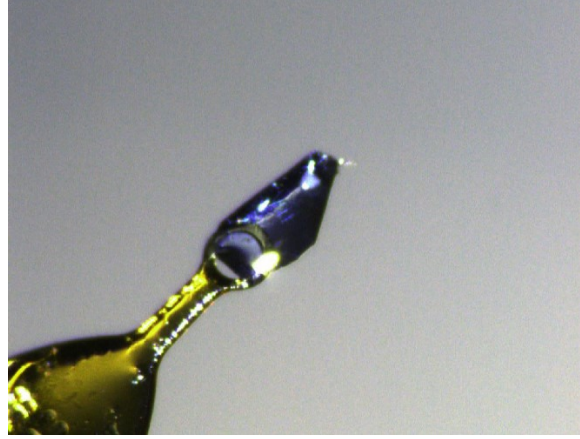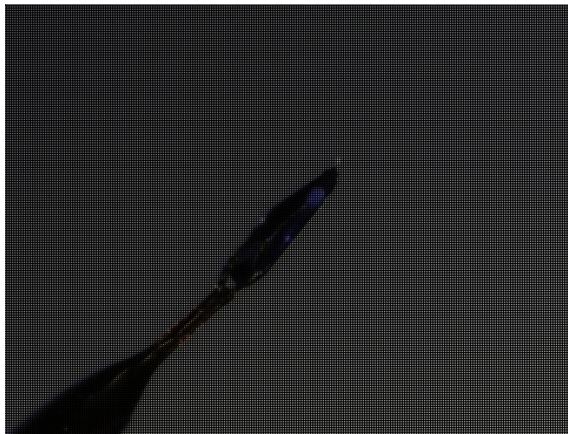

*Figure - Crystal views*

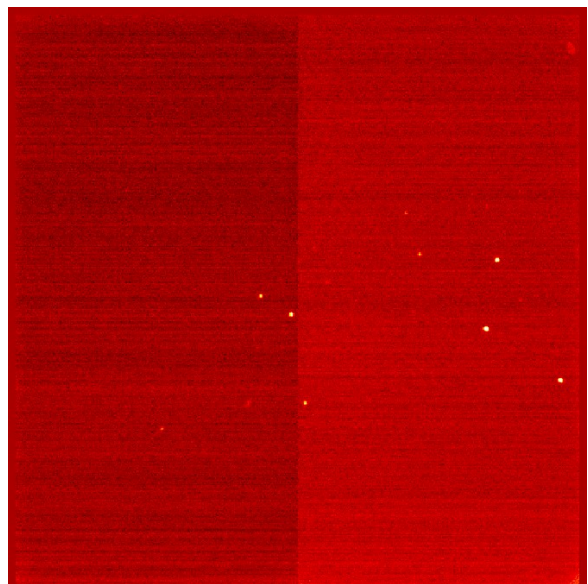

*Figure - Frames views*

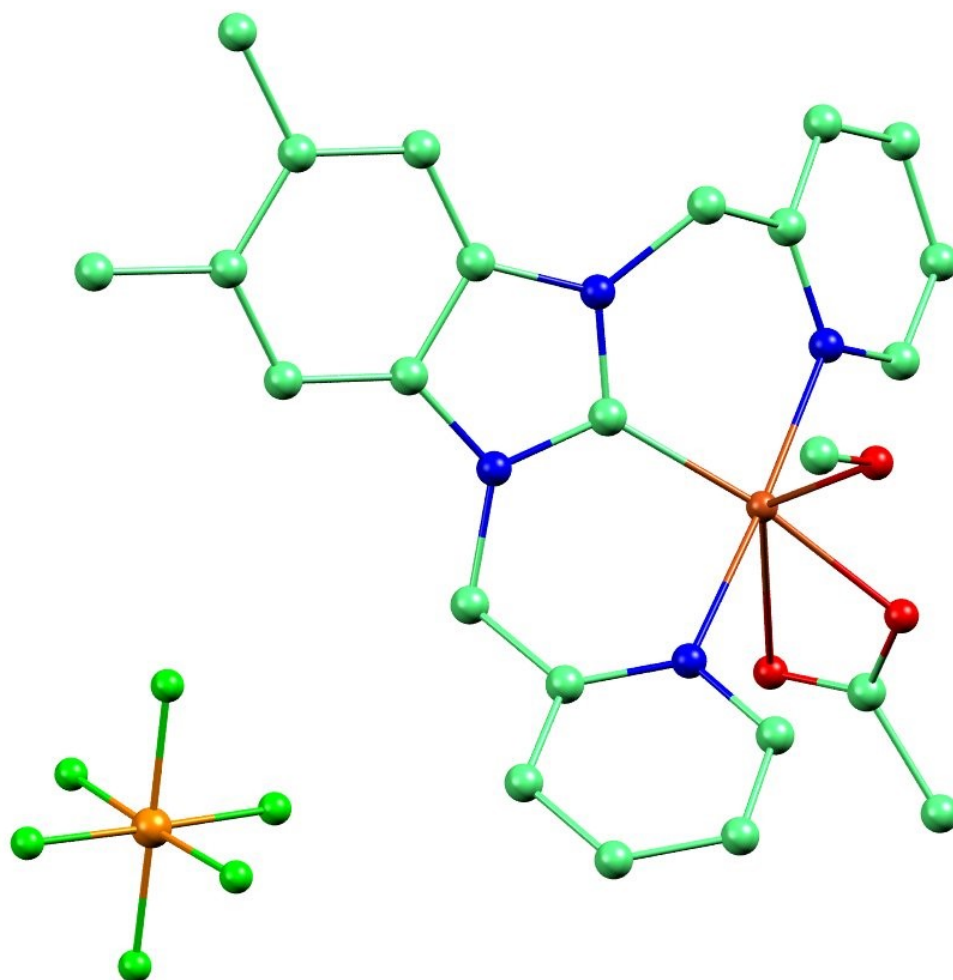

*Figure - Asymmetric unit*

*Table S9. Sample and crystal data for 3b.*

---

|                               |                                                                                  |                 |
|-------------------------------|----------------------------------------------------------------------------------|-----------------|
| <b>Identification code</b>    | Cu_C_JM_001                                                                      |                 |
| <b>Chemical formula</b>       | C <sub>24</sub> H <sub>27</sub> CuF <sub>6</sub> N <sub>4</sub> O <sub>3</sub> P |                 |
| <b>Formula weight</b>         | 628.00 g/mol                                                                     |                 |
| <b>Temperature</b>            | 200(2) K                                                                         |                 |
| <b>Wavelength</b>             | 1.54178 Å                                                                        |                 |
| <b>Crystal size</b>           | (0.107 x 0.250 x 0.636) mm <sup>3</sup>                                          |                 |
| <b>Crystal system</b>         | triclinic                                                                        |                 |
| <b>Space group</b>            | P -1                                                                             |                 |
| <b>Unit cell dimensions</b>   | a = 9.4890(14) Å                                                                 | α = 111.242(6)° |
|                               | b = 10.9068(16) Å                                                                | β = 103.332(6)° |
|                               | c = 14.481(2) Å                                                                  | γ = 96.766(5)°  |
| <b>Volume</b>                 | 1325.3(3) Å <sup>3</sup>                                                         |                 |
| <b>Z</b>                      | 2                                                                                |                 |
| <b>Density (calculated)</b>   | 1.572 g/cm <sup>3</sup>                                                          |                 |
| <b>Absorption coefficient</b> | 2.432 mm <sup>-1</sup>                                                           |                 |
| <b>F(000)</b>                 | 642                                                                              |                 |

*Table S10. Data collection and structure refinement for 3b.*

---

|                                            |                                    |
|--------------------------------------------|------------------------------------|
| <b>Theta range for data collection</b>     | 3.43 to 68.24°                     |
| <b>Index ranges</b>                        | -11<=h<=11, -13<=k<=13, -17<=l<=17 |
| <b>Reflections collected</b>               | 29336                              |
| <b>Independent reflections</b>             | 4812 [R(int) = 0.0377]             |
| <b>Coverage of independent reflections</b> | 99.0%                              |
| <b>Absorption correction</b>               | Multi-Scan                         |
| <b>Max. and min. transmission</b>          | 0.7810 and 0.3070                  |
| <b>Structure solution technique</b>        | direct methods                     |

|                                         |                                             |                           |
|-----------------------------------------|---------------------------------------------|---------------------------|
| <b>Structure solution program</b>       | XT, VERSION 2014/5                          |                           |
| <b>Refinement method</b>                | Full-matrix least-squares on F <sup>2</sup> |                           |
| <b>Refinement program</b>               | SHELXL-2018/3 (Sheldrick, 2018)             |                           |
| <b>Function minimized</b>               | $\Sigma w(F_o^2 - F_c^2)^2$                 |                           |
| <b>Data / restraints / parameters</b>   | 4812 / 183 / 474                            |                           |
| <b>Goodness-of-fit on F<sup>2</sup></b> | 1.061                                       |                           |
| $\Delta/\sigma_{\max}$                  | 0.001                                       |                           |
| <b>Final R indices</b>                  | 4349 data;                                  | R1 = 0.0363, wR2 = 0.0898 |
|                                         | I > 2 $\sigma$ (I)                          |                           |
|                                         | all data                                    | R1 = 0.0414, wR2 = 0.0944 |
| <b>Weighting scheme</b>                 | $w=1/[\sigma^2(F_o^2)+(0.0322P)^2+1.3940P]$ |                           |
|                                         | where $P=(F_o^2+2F_c^2)/3$                  |                           |
| <b>Extinction coefficient</b>           | 0.0026(2)                                   |                           |
| <b>Largest diff. peak and hole</b>      | 0.511 and -0.369 eÅ <sup>-3</sup>           |                           |
| <b>R.M.S. deviation from mean</b>       | 0.057 eÅ <sup>-3</sup>                      |                           |

*Table S11. Atomic coordinates and equivalent isotropic atomic displacement parameters (Å<sup>2</sup>) for 3b.*

*U(eq) is defined as one third of the trace of the orthogonalized U<sub>ij</sub> tensor.*

|    | <b>x/a</b> | <b>y/b</b>  | <b>z/c</b>  | <b>U(eq)</b> |
|----|------------|-------------|-------------|--------------|
| Cu | 0.50974(4) | 0.23824(3)  | 0.15753(2)  | 0.03451(13)  |
| N1 | 0.6944(2)  | 0.1813(2)   | 0.22635(15) | 0.0362(4)    |
| N2 | 0.3143(2)  | 0.2917(2)   | 0.09503(15) | 0.0399(5)    |
| N3 | 0.4834(2)  | 0.22838(19) | 0.35155(14) | 0.0325(4)    |
| N4 | 0.3756(2)  | 0.37723(19) | 0.31818(15) | 0.0337(4)    |
| C1 | 0.8188(3)  | 0.1983(3)   | 0.1989(2)   | 0.0436(6)    |
| C2 | 0.9504(3)  | 0.1748(3)   | 0.2455(2)   | 0.0510(7)    |
| C3 | 0.9566(3)  | 0.1328(3)   | 0.3243(2)   | 0.0539(7)    |

|      | <b>x/a</b>  | <b>y/b</b>  | <b>z/c</b>  | <b>U(eq)</b> |
|------|-------------|-------------|-------------|--------------|
| C4   | 0.8294(3)   | 0.1160(3)   | 0.3547(2)   | 0.0470(6)    |
| C5   | 0.6999(3)   | 0.1410(2)   | 0.30462(18) | 0.0360(5)    |
| C6   | 0.5609(3)   | 0.1169(2)   | 0.33583(19) | 0.0383(5)    |
| C7   | 0.4585(3)   | 0.2883(2)   | 0.28538(17) | 0.0326(5)    |
| C8   | 0.3430(2)   | 0.3734(2)   | 0.40657(17) | 0.0315(5)    |
| C9   | 0.2604(3)   | 0.4416(2)   | 0.46775(18) | 0.0353(5)    |
| C10  | 0.2435(3)   | 0.4071(2)   | 0.54832(18) | 0.0367(5)    |
| C11  | 0.3128(3)   | 0.3077(2)   | 0.56906(18) | 0.0366(5)    |
| C12  | 0.3985(3)   | 0.2431(2)   | 0.50923(18) | 0.0345(5)    |
| C13  | 0.4116(2)   | 0.2768(2)   | 0.42772(17) | 0.0309(5)    |
| C14  | 0.3282(3)   | 0.4626(2)   | 0.26427(19) | 0.0401(6)    |
| C15  | 0.2488(3)   | 0.3819(2)   | 0.15093(19) | 0.0373(5)    |
| C16  | 0.1154(3)   | 0.4059(3)   | 0.1055(2)   | 0.0491(7)    |
| C17  | 0.0501(3)   | 0.3366(3)   | 0.9996(3)   | 0.0622(8)    |
| C18  | 0.1168(3)   | 0.2452(3)   | 0.9428(2)   | 0.0610(8)    |
| C19  | 0.2475(3)   | 0.2236(3)   | 0.9924(2)   | 0.0515(7)    |
| C20  | 0.1473(3)   | 0.4739(3)   | 0.6126(2)   | 0.0514(7)    |
| C21  | 0.2924(3)   | 0.2687(3)   | 0.6559(2)   | 0.0507(7)    |
| O1A  | 0.5554(18)  | 0.2115(12)  | 0.0297(12)  | 0.036(2)     |
| C22A | 0.609(3)    | 0.3265(14)  | 0.0308(10)  | 0.059(6)     |
| C23A | 0.594(2)    | 0.3320(18)  | 0.9272(10)  | 0.070(5)     |
| O2A  | 0.6563(14)  | 0.4289(13)  | 0.1119(10)  | 0.073(3)     |
| O1S  | 0.3638(15)  | 0.0178(13)  | 0.0711(8)   | 0.041(2)     |
| C1S  | 0.220(3)    | 0.979(2)    | 0.0797(18)  | 0.052(4)     |
| P1A  | 0.20075(14) | 0.82657(13) | 0.34538(14) | 0.0312(15)   |
| F1A  | 0.2060(10)  | 0.7199(7)   | 0.3980(6)   | 0.067(4)     |
| F2A  | 0.1989(10)  | 0.9338(7)   | 0.2954(7)   | 0.082(3)     |
| F3A  | 0.0878(8)   | 0.7151(6)   | 0.2446(5)   | 0.120(3)     |
| F4A  | 0.0734(6)   | 0.8744(7)   | 0.3911(6)   | 0.093(2)     |
| F5A  | 0.3325(7)   | 0.7799(8)   | 0.3027(6)   | 0.096(3)     |
| F6A  | 0.3179(6)   | 0.9338(6)   | 0.4461(4)   | 0.081(2)     |
| O1B  | 0.5814(18)  | 0.2222(11)  | 0.0348(12)  | 0.035(2)     |
| C22B | 0.6073(19)  | 0.3434(10)  | 0.0397(7)   | 0.032(3)     |



|      | x/a        | y/b        | z/c        | U(eq)    |
|------|------------|------------|------------|----------|
| C23B | 0.622(2)   | 0.3586(17) | 0.9435(10) | 0.059(3) |
| O2B  | 0.6192(13) | 0.4418(12) | 0.1196(9)  | 0.057(2) |
| O1T  | 0.3827(15) | 0.0137(13) | 0.0943(8)  | 0.040(2) |
| C1T  | 0.236(3)   | 0.980(3)   | 0.0961(19) | 0.061(5) |
| P1B  | 0.200300   | 0.826621   | 0.341208   | 0.054(2) |
| F1B  | 0.2209(10) | 0.7347(7)  | 0.4065(6)  | 0.059(3) |
| F2B  | 0.1804(10) | 0.9184(7)  | 0.2783(6)  | 0.075(3) |
| F3B  | 0.0467(6)  | 0.7285(8)  | 0.2714(5)  | 0.106(3) |
| F4B  | 0.1212(7)  | 0.9134(7)  | 0.4181(4)  | 0.085(2) |
| F5B  | 0.2796(8)  | 0.7391(6)  | 0.2669(5)  | 0.090(2) |
| F6B  | 0.3518(5)  | 0.9227(6)  | 0.4143(5)  | 0.087(2) |

**Table S12. Bond lengths (Å) for 3b.**

---

|        |           |        |           |
|--------|-----------|--------|-----------|
| Cu-O1A | 1.925(16) | Cu-C7  | 1.925(2)  |
| Cu-O1B | 2.002(15) | Cu-N1  | 2.086(2)  |
| Cu-N2  | 2.112(2)  | Cu-O1T | 2.337(13) |
| Cu-O1S | 2.346(13) | N1-C1  | 1.343(3)  |
| N1-C5  | 1.349(3)  | N2-C15 | 1.345(3)  |
| N2-C19 | 1.348(3)  | N3-C7  | 1.337(3)  |
| N3-C13 | 1.403(3)  | N3-C6  | 1.469(3)  |
| N4-C7  | 1.343(3)  | N4-C8  | 1.398(3)  |
| N4-C14 | 1.463(3)  | C1-C2  | 1.375(4)  |
| C1-H1  | 0.950000  | C2-C3  | 1.367(4)  |
| C2-H2  | 0.950000  | C3-C4  | 1.391(4)  |
| C3-H3  | 0.950000  | C4-C5  | 1.386(3)  |
| C4-H4  | 0.950000  | C5-C6  | 1.514(3)  |
| C6-H6A | 0.990000  | C6-H6B | 0.990000  |
| C8-C13 | 1.390(3)  | C8-C9  | 1.390(3)  |
| C9-C10 | 1.385(3)  | C9-H9  | 0.950000  |

|           |           |           |           |
|-----------|-----------|-----------|-----------|
| C10-C11   | 1.418(4)  | C10-C20   | 1.512(3)  |
| C11-C12   | 1.388(3)  | C11-C21   | 1.510(3)  |
| C12-C13   | 1.384(3)  | C12-H12   | 0.950000  |
| C14-C15   | 1.504(4)  | C14-H14A  | 0.990000  |
| C14-H14B  | 0.990000  | C15-C16   | 1.386(4)  |
| C16-C17   | 1.385(4)  | C16-H16   | 0.950000  |
| C17-C18   | 1.366(5)  | C17-H17   | 0.950000  |
| C18-C19   | 1.375(4)  | C18-H18   | 0.950000  |
| C19-H19   | 0.950000  | C20-H20A  | 0.980000  |
| C20-H20B  | 0.980000  | C20-H20C  | 0.980000  |
| C21-H21A  | 0.980000  | C21-H21B  | 0.980000  |
| C21-H21C  | 0.980000  | O1A-C22A  | 1.289(7)  |
| C22A-O2A  | 1.232(8)  | C22A-C23A | 1.499(7)  |
| C23A-H23A | 0.980000  | C23A-H23B | 0.980000  |
| C23A-H23C | 0.980000  | O1S-C1S   | 1.43(3)   |
| O1S-H1S   | 1.040(15) | C1S-H1S1  | 0.980000  |
| C1S-H1S2  | 0.980000  | C1S-H1S3  | 0.980000  |
| P1A-F4A   | 1.561(3)  | P1A-F6A   | 1.562(3)  |
| P1A-F3A   | 1.563(4)  | P1A-F5A   | 1.575(3)  |
| P1A-F2A   | 1.583(3)  | P1A-F1A   | 1.605(3)  |
| O1B-C22B  | 1.288(7)  | C22B-O2B  | 1.230(8)  |
| C22B-C23B | 1.497(6)  | C23B-H23D | 0.980000  |
| C23B-H23E | 0.980000  | C23B-H23F | 0.980000  |
| O1T-C1T   | 1.40(3)   | O1T-H1T   | 1.033(14) |
| C1T-H1T1  | 0.980000  | C1T-H1T2  | 0.980000  |
| C1T-H1T3  | 0.980000  | P1B-F6B   | 1.558(3)  |
| P1B-F5B   | 1.560(3)  | P1B-F3B   | 1.569(4)  |
| P1B-F4B   | 1.578(3)  | P1B-F2B   | 1.579(3)  |
| P1B-F1B   | 1.608(3)  |           |           |

**Table S13. Bond angles (°) for 3b.**

|             |            |             |            |
|-------------|------------|-------------|------------|
| O1A-Cu-C7   | 172.1(4)   | C7-Cu-O1B   | 169.4(3)   |
| O1A-Cu-N1   | 96.8(5)    | C7-Cu-N1    | 88.74(9)   |
| O1B-Cu-N1   | 92.2(5)    | O1A-Cu-N2   | 87.2(5)    |
| C7-Cu-N2    | 87.53(9)   | O1B-Cu-N2   | 91.9(5)    |
| N1-Cu-N2    | 175.65(8)  | C7-Cu-O1T   | 93.5(3)    |
| O1B-Cu-O1T  | 97.1(4)    | N1-Cu-O1T   | 87.2(3)    |
| N2-Cu-O1T   | 90.8(3)    | O1A-Cu-O1S  | 86.4(5)    |
| C7-Cu-O1S   | 98.8(3)    | N1-Cu-O1S   | 94.4(3)    |
| N2-Cu-O1S   | 84.0(3)    | C1-N1-C5    | 118.2(2)   |
| C1-N1-Cu    | 118.51(17) | C5-N1-Cu    | 122.97(16) |
| C15-N2-C19  | 118.6(2)   | C15-N2-Cu   | 124.77(16) |
| C19-N2-Cu   | 116.53(18) | C7-N3-C13   | 110.33(18) |
| C7-N3-C6    | 122.62(19) | C13-N3-C6   | 126.68(19) |
| C7-N4-C8    | 110.79(18) | C7-N4-C14   | 122.12(19) |
| C8-N4-C14   | 127.08(19) | N1-C1-C2    | 123.3(3)   |
| N1-C1-H1    | 118.300000 | C2-C1-H1    | 118.300000 |
| C3-C2-C1    | 118.9(3)   | C3-C2-H2    | 120.500000 |
| C1-C2-H2    | 120.500000 | C2-C3-C4    | 118.6(2)   |
| C2-C3-H3    | 120.700000 | C4-C3-H3    | 120.700000 |
| C5-C4-C3    | 119.8(3)   | C5-C4-H4    | 120.100000 |
| C3-C4-H4    | 120.100000 | N1-C5-C4    | 121.2(2)   |
| N1-C5-C6    | 119.7(2)   | C4-C5-C6    | 119.1(2)   |
| N3-C6-C5    | 113.6(2)   | N3-C6-H6A   | 108.900000 |
| C5-C6-H6A   | 108.900000 | N3-C6-H6B   | 108.900000 |
| C5-C6-H6B   | 108.900000 | H6A-C6-H6B  | 107.700000 |
| N3-C7-N4    | 107.10(19) | N3-C7-Cu    | 125.77(17) |
| N4-C7-Cu    | 126.64(17) | C13-C8-C9   | 121.2(2)   |
| C13-C8-N4   | 105.58(19) | C9-C8-N4    | 133.3(2)   |
| C10-C9-C8   | 118.1(2)   | C10-C9-H9   | 120.900000 |
| C8-C9-H9    | 120.900000 | C9-C10-C11  | 120.5(2)   |
| C9-C10-C20  | 119.4(2)   | C11-C10-C20 | 120.1(2)   |
| C12-C11-C10 | 120.8(2)   | C12-C11-C21 | 118.8(2)   |
| C10-C11-C21 | 120.4(2)   | C13-C12-C11 | 118.0(2)   |
| C13-C12-H12 | 121.000000 | C11-C12-H12 | 121.000000 |

|                |            |                |            |
|----------------|------------|----------------|------------|
| C12-C13-C8     | 121.4(2)   | C12-C13-N3     | 132.4(2)   |
| C8-C13-N3      | 106.17(19) | N4-C14-C15     | 112.33(19) |
| N4-C14-H14A    | 109.100000 | C15-C14-H14A   | 109.100000 |
| N4-C14-H14B    | 109.100000 | C15-C14-H14B   | 109.100000 |
| H14A-C14-H14B  | 107.900000 | N2-C15-C16     | 121.6(2)   |
| N2-C15-C14     | 118.1(2)   | C16-C15-C14    | 120.2(2)   |
| C17-C16-C15    | 118.8(3)   | C17-C16-H16    | 120.600000 |
| C15-C16-H16    | 120.600000 | C18-C17-C16    | 119.6(3)   |
| C18-C17-H17    | 120.200000 | C16-C17-H17    | 120.200000 |
| C17-C18-C19    | 119.0(3)   | C17-C18-H18    | 120.500000 |
| C19-C18-H18    | 120.500000 | N2-C19-C18     | 122.3(3)   |
| N2-C19-H19     | 118.800000 | C18-C19-H19    | 118.800000 |
| C10-C20-H20A   | 109.500000 | C10-C20-H20B   | 109.500000 |
| H20A-C20-H20B  | 109.500000 | C10-C20-H20C   | 109.500000 |
| H20A-C20-H20C  | 109.500000 | H20B-C20-H20C  | 109.500000 |
| C11-C21-H21A   | 109.500000 | C11-C21-H21B   | 109.500000 |
| H21A-C21-H21B  | 109.500000 | C11-C21-H21C   | 109.500000 |
| H21A-C21-H21C  | 109.500000 | H21B-C21-H21C  | 109.500000 |
| C22A-O1A-Cu    | 109.6(9)   | O2A-C22A-O1A   | 121.8(6)   |
| O2A-C22A-C23A  | 121.6(7)   | O1A-C22A-C23A  | 116.3(8)   |
| C22A-C23A-H23A | 109.500000 | C22A-C23A-H23B | 109.500000 |
| H23A-C23A-H23B | 109.500000 | C22A-C23A-H23C | 109.500000 |
| H23A-C23A-H23C | 109.500000 | H23B-C23A-H23C | 109.500000 |
| C1S-O1S-Cu     | 123.7(12)  | C1S-O1S-H1S    | 112.7(14)  |
| Cu-O1S-H1S     | 121.7(10)  | O1S-C1S-H1S1   | 109.500000 |
| O1S-C1S-H1S2   | 109.500000 | H1S1-C1S-H1S2  | 109.500000 |
| O1S-C1S-H1S3   | 109.500000 | H1S1-C1S-H1S3  | 109.500000 |
| H1S2-C1S-H1S3  | 109.500000 | F4A-P1A-F6A    | 89.8(3)    |
| F4A-P1A-F3A    | 92.1(4)    | F6A-P1A-F3A    | 177.6(3)   |
| F4A-P1A-F5A    | 178.3(4)   | F6A-P1A-F5A    | 88.7(4)    |
| F3A-P1A-F5A    | 89.5(4)    | F4A-P1A-F2A    | 90.5(3)    |
| F6A-P1A-F2A    | 89.5(3)    | F3A-P1A-F2A    | 92.0(3)    |
| F5A-P1A-F2A    | 90.2(3)    | F4A-P1A-F1A    | 89.8(3)    |
| F6A-P1A-F1A    | 89.3(3)    | F3A-P1A-F1A    | 89.2(3)    |

|                |            |                |            |
|----------------|------------|----------------|------------|
| F5A-P1A-F1A    | 89.4(3)    | F2A-P1A-F1A    | 178.7(4)   |
| C22B-O1B-Cu    | 104.7(9)   | O2B-C22B-O1B   | 121.6(5)   |
| O2B-C22B-C23B  | 121.7(6)   | O1B-C22B-C23B  | 116.8(7)   |
| C22B-C23B-H23D | 109.500000 | C22B-C23B-H23E | 109.500000 |
| H23D-C23B-H23E | 109.500000 | C22B-C23B-H23F | 109.500000 |
| H23D-C23B-H23F | 109.500000 | H23E-C23B-H23F | 109.500000 |
| C1T-O1T-Cu     | 121.4(14)  | C1T-O1T-H1T    | 111.8(14)  |
| Cu-O1T-H1T     | 122.8(10)  | O1T-C1T-H1T1   | 109.500000 |
| O1T-C1T-H1T2   | 109.500000 | H1T1-C1T-H1T2  | 109.500000 |
| O1T-C1T-H1T3   | 109.500000 | H1T1-C1T-H1T3  | 109.500000 |
| H1T2-C1T-H1T3  | 109.500000 | F6B-P1B-F5B    | 91.0(4)    |
| F6B-P1B-F3B    | 177.7(3)   | F5B-P1B-F3B    | 90.2(4)    |
| F6B-P1B-F4B    | 88.8(3)    | F5B-P1B-F4B    | 178.6(3)   |
| F3B-P1B-F4B    | 90.0(4)    | F6B-P1B-F2B    | 90.5(3)    |
| F5B-P1B-F2B    | 91.0(3)    | F3B-P1B-F2B    | 91.5(3)    |
| F4B-P1B-F2B    | 90.4(3)    | F6B-P1B-F1B    | 89.1(3)    |
| F5B-P1B-F1B    | 89.6(3)    | F3B-P1B-F1B    | 88.9(3)    |
| F4B-P1B-F1B    | 89.1(3)    | F2B-P1B-F1B    | 179.3(3)   |

**Table S14. Torsion angles (°) for 3b.**

---

|             |             |             |           |
|-------------|-------------|-------------|-----------|
| C5-N1-C1-C2 | 1.0(4)      | Cu-N1-C1-C2 | 174.4(2)  |
| N1-C1-C2-C3 | -0.5(4)     | C1-C2-C3-C4 | -0.3(4)   |
| C2-C3-C4-C5 | 0.4(4)      | C1-N1-C5-C4 | -0.8(4)   |
| Cu-N1-C5-C4 | -173.92(19) | C1-N1-C5-C6 | -178.3(2) |
| Cu-N1-C5-C6 | 8.6(3)      | C3-C4-C5-N1 | 0.1(4)    |
| C3-C4-C5-C6 | 177.6(2)    | C7-N3-C6-C5 | 45.2(3)   |

|                 |             |                  |             |
|-----------------|-------------|------------------|-------------|
| C13-N3-C6-C5    | -142.4(2)   | N1-C5-C6-N3      | -49.5(3)    |
| C4-C5-C6-N3     | 133.0(2)    | C13-N3-C7-N4     | 1.6(3)      |
| C6-N3-C7-N4     | 175.1(2)    | C13-N3-C7-Cu     | -170.83(16) |
| C6-N3-C7-Cu     | 2.7(3)      | C8-N4-C7-N3      | -1.2(3)     |
| C14-N4-C7-N3    | 179.4(2)    | C8-N4-C7-Cu      | 171.12(16)  |
| C14-N4-C7-Cu    | -8.3(3)     | C7-N4-C8-C13     | 0.4(3)      |
| C14-N4-C8-C13   | 179.7(2)    | C7-N4-C8-C9      | -178.5(2)   |
| C14-N4-C8-C9    | 0.9(4)      | C13-C8-C9-C10    | -2.4(3)     |
| N4-C8-C9-C10    | 176.3(2)    | C8-C9-C10-C11    | 1.9(3)      |
| C8-C9-C10-C20   | -176.6(2)   | C9-C10-C11-C12   | 0.0(3)      |
| C20-C10-C11-C12 | 178.5(2)    | C9-C10-C11-C21   | -179.1(2)   |
| C20-C10-C11-C21 | -0.6(4)     | C10-C11-C12-C13  | -1.3(3)     |
| C21-C11-C12-C13 | 177.8(2)    | C11-C12-C13-C8   | 0.8(3)      |
| C11-C12-C13-N3  | -177.3(2)   | C9-C8-C13-C12    | 1.1(3)      |
| N4-C8-C13-C12   | -177.9(2)   | C9-C8-C13-N3     | 179.6(2)    |
| N4-C8-C13-N3    | 0.6(2)      | C7-N3-C13-C12    | 176.9(2)    |
| C6-N3-C13-C12   | 3.7(4)      | C7-N3-C13-C8     | -1.4(3)     |
| C6-N3-C13-C8    | -174.5(2)   | C7-N4-C14-C15    | 54.0(3)     |
| C8-N4-C14-C15   | -125.3(2)   | C19-N2-C15-C16   | 0.0(4)      |
| Cu-N2-C15-C16   | -175.86(19) | C19-N2-C15-C14   | -176.9(2)   |
| Cu-N2-C15-C14   | 7.3(3)      | N4-C14-C15-N2    | -50.8(3)    |
| N4-C14-C15-C16  | 132.3(2)    | N2-C15-C16-C17   | -1.2(4)     |
| C14-C15-C16-C17 | 175.6(3)    | C15-C16-C17-C18  | 1.0(5)      |
| C16-C17-C18-C19 | 0.3(5)      | C15-N2-C19-C18   | 1.4(4)      |
| Cu-N2-C19-C18   | 177.6(2)    | C17-C18-C19-N2   | -1.5(5)     |
| Cu-O1A-C22A-O2A | 17.(3)      | Cu-O1A-C22A-C23A | -156.7(16)  |
| Cu-O1B-C22B-O2B | 16.(2)      | Cu-O1B-C22B-C23B | -163.6(14)  |

**Table S15. Anisotropic atomic displacement parameters ( $\text{\AA}^2$ ) for 3b.**

---

**The anisotropic atomic displacement factor exponent takes the form:  $-2\pi^2$**

$$h^2 a^{*2} U_{11} + \dots + 2 h k a^* b^* U_{12}]$$

|      | U <sub>11</sub> | U <sub>22</sub> | U <sub>33</sub> | U <sub>23</sub> | U <sub>13</sub> | U <sub>12</sub> |
|------|-----------------|-----------------|-----------------|-----------------|-----------------|-----------------|
| Cu   | 0.0376(2)       | 0.0418(2)       | 0.0293(2)       | 0.01684(15)     | 0.01206(14)     | 0.01535(15)     |
| N1   | 0.0378(10)      | 0.0406(11)      | 0.0325(10)      | 0.0142(9)       | 0.0122(8)       | 0.0154(9)       |
| N2   | 0.0390(11)      | 0.0472(12)      | 0.0334(11)      | 0.0184(9)       | 0.0061(9)       | 0.0114(9)       |
| N3   | 0.0354(10)      | 0.0368(10)      | 0.0319(10)      | 0.0167(8)       | 0.0132(8)       | 0.0163(8)       |
| N4   | 0.0386(10)      | 0.0358(10)      | 0.0330(10)      | 0.0171(8)       | 0.0128(8)       | 0.0162(8)       |
| C1   | 0.0411(14)      | 0.0524(15)      | 0.0422(14)      | 0.0191(12)      | 0.0176(11)      | 0.0171(12)      |
| C2   | 0.0399(14)      | 0.0621(17)      | 0.0541(16)      | 0.0201(14)      | 0.0201(12)      | 0.0209(13)      |
| C3   | 0.0440(15)      | 0.0656(18)      | 0.0552(17)      | 0.0237(15)      | 0.0121(13)      | 0.0301(14)      |
| C4   | 0.0509(15)      | 0.0550(16)      | 0.0457(15)      | 0.0251(13)      | 0.0170(12)      | 0.0293(13)      |
| C5   | 0.0415(13)      | 0.0353(12)      | 0.0332(12)      | 0.0126(10)      | 0.0124(10)      | 0.0175(10)      |
| C6   | 0.0473(14)      | 0.0398(13)      | 0.0402(13)      | 0.0223(11)      | 0.0188(11)      | 0.0227(11)      |
| C7   | 0.0359(12)      | 0.0351(12)      | 0.0279(11)      | 0.0129(9)       | 0.0087(9)       | 0.0129(9)       |
| C8   | 0.0313(11)      | 0.0321(11)      | 0.0292(11)      | 0.0116(9)       | 0.0067(9)       | 0.0074(9)       |
| C9   | 0.0336(12)      | 0.0325(11)      | 0.0364(12)      | 0.0097(10)      | 0.0094(10)      | 0.0109(9)       |
| C10  | 0.0322(12)      | 0.0373(12)      | 0.0354(12)      | 0.0088(10)      | 0.0107(10)      | 0.0070(10)      |
| C11  | 0.0332(12)      | 0.0399(13)      | 0.0334(12)      | 0.0127(10)      | 0.0095(10)      | 0.0036(10)      |
| C12  | 0.0363(12)      | 0.0341(12)      | 0.0335(12)      | 0.0146(10)      | 0.0091(10)      | 0.0089(10)      |
| C13  | 0.0306(11)      | 0.0315(11)      | 0.0288(11)      | 0.0100(9)       | 0.0085(9)       | 0.0079(9)       |
| C14  | 0.0502(14)      | 0.0360(12)      | 0.0414(13)      | 0.0205(11)      | 0.0145(11)      | 0.0185(11)      |
| C15  | 0.0372(12)      | 0.0379(12)      | 0.0438(13)      | 0.0252(11)      | 0.0101(10)      | 0.0090(10)      |
| C16  | 0.0428(14)      | 0.0477(15)      | 0.0606(17)      | 0.0299(14)      | 0.0071(13)      | 0.0138(12)      |
| C17  | 0.0434(16)      | 0.0647(19)      | 0.075(2)        | 0.0396(17)      | -0.0068(15)     | 0.0107(14)      |
| C18  | 0.0559(18)      | 0.0665(19)      | 0.0477(17)      | 0.0242(15)      | -0.0073(14)     | 0.0078(15)      |
| C19  | 0.0509(16)      | 0.0606(17)      | 0.0386(14)      | 0.0199(13)      | 0.0048(12)      | 0.0135(13)      |
| C20  | 0.0512(16)      | 0.0570(17)      | 0.0495(16)      | 0.0161(13)      | 0.0258(13)      | 0.0211(13)      |
| C21  | 0.0559(16)      | 0.0617(17)      | 0.0453(15)      | 0.0268(14)      | 0.0251(13)      | 0.0147(14)      |
| O1A  | 0.035(4)        | 0.041(3)        | 0.036(3)        | 0.017(2)        | 0.014(3)        | 0.008(2)        |
| C22A | 0.059(6)        | 0.060(7)        | 0.058(6)        | 0.020(4)        | 0.022(4)        | 0.019(4)        |
| C23A | 0.087(9)        | 0.079(8)        | 0.071(7)        | 0.056(6)        | 0.032(5)        | 0.017(6)        |
| O2A  | 0.096(7)        | 0.052(4)        | 0.064(5)        | 0.018(4)        | 0.020(4)        | 0.017(4)        |
| O1S  | 0.040(3)        | 0.042(3)        | 0.041(4)        | 0.016(3)        | 0.013(3)        | 0.009(2)        |

|      | $U_{11}$ | $U_{22}$ | $U_{33}$ | $U_{23}$   | $U_{13}$   | $U_{12}$   |
|------|----------|----------|----------|------------|------------|------------|
| C1S  | 0.048(6) | 0.059(6) | 0.051(6) | 0.019(5)   | 0.028(5)   | 0.006(5)   |
| P1A  | 0.034(2) | 0.035(2) | 0.027(2) | 0.0130(16) | 0.0085(16) | 0.0148(18) |
| F1A  | 0.091(6) | 0.051(4) | 0.072(5) | 0.031(3)   | 0.035(4)   | 0.020(3)   |
| F2A  | 0.111(6) | 0.103(6) | 0.082(5) | 0.068(4)   | 0.049(4)   | 0.061(4)   |
| F3A  | 0.153(6) | 0.079(4) | 0.061(3) | 0.003(3)   | -0.043(4)  | 0.016(4)   |
| F4A  | 0.053(2) | 0.107(5) | 0.151(6) | 0.066(4)   | 0.053(3)   | 0.044(3)   |
| F5A  | 0.104(4) | 0.143(6) | 0.106(5) | 0.080(4)   | 0.069(4)   | 0.088(4)   |
| F6A  | 0.110(5) | 0.049(3) | 0.054(2) | 0.017(2)   | -0.006(3)  | -0.015(3)  |
| O1B  | 0.038(5) | 0.039(4) | 0.035(3) | 0.018(2)   | 0.016(3)   | 0.012(3)   |
| C22B | 0.038(4) | 0.033(4) | 0.031(4) | 0.019(3)   | 0.011(3)   | 0.008(3)   |
| C23B | 0.068(6) | 0.064(6) | 0.058(5) | 0.035(4)   | 0.028(5)   | 0.017(5)   |
| O2B  | 0.066(4) | 0.041(3) | 0.058(4) | 0.012(3)   | 0.021(3)   | 0.016(3)   |
| O1T  | 0.043(4) | 0.039(3) | 0.037(4) | 0.013(3)   | 0.013(3)   | 0.008(2)   |
| C1T  | 0.057(7) | 0.060(7) | 0.066(9) | 0.024(6)   | 0.020(6)   | 0.011(5)   |
| P1B  | 0.057(4) | 0.059(4) | 0.050(3) | 0.027(2)   | 0.013(2)   | 0.017(3)   |
| F1B  | 0.080(5) | 0.047(4) | 0.057(4) | 0.031(3)   | 0.014(3)   | 0.017(3)   |
| F2B  | 0.104(5) | 0.087(5) | 0.060(3) | 0.055(3)   | 0.022(3)   | 0.038(4)   |
| F3B  | 0.060(3) | 0.154(6) | 0.087(4) | 0.063(4)   | -0.008(3)  | -0.027(3)  |
| F4B  | 0.135(6) | 0.103(4) | 0.067(3) | 0.054(3)   | 0.064(3)   | 0.078(4)   |
| F5B  | 0.157(6) | 0.062(3) | 0.088(4) | 0.034(3)   | 0.090(4)   | 0.044(3)   |
| F6B  | 0.052(2) | 0.071(4) | 0.124(5) | 0.055(4)   | -0.018(3)  | -0.005(2)  |

*Table S16. Hydrogen atomic coordinates and isotropic atomic displacement parameters ( $\text{\AA}^2$ ) for 3b.*

---

|    | $x/a$  | $y/b$  | $z/c$  | $U(\text{eq})$ |
|----|--------|--------|--------|----------------|
| H1 | 0.8157 | 0.2281 | 0.1446 | 0.052000       |
| H2 | 1.0356 | 0.1876 | 0.2233 | 0.061000       |
| H3 | 1.0459 | 0.1155 | 0.3576 | 0.065000       |
| H4 | 0.8313 | 0.0875 | 0.4096 | 0.056000       |



|      | <b>x/a</b> | <b>y/b</b> | <b>z/c</b> | <b>U(eq)</b> |
|------|------------|------------|------------|--------------|
| H6A  | 0.4921     | 0.0334     | 0.2814     | 0.046000     |
| H6B  | 0.5881     | 0.1027     | 0.4008     | 0.046000     |
| H9   | 0.2168     | 0.5100     | 0.4547     | 0.042000     |
| H12  | 0.4467     | 0.1778     | 0.5238     | 0.041000     |
| H14A | 0.4163     | 0.5277     | 0.2716     | 0.048000     |
| H14B | 0.2614     | 0.5146     | 0.2973     | 0.048000     |
| H16  | 0.0696     | 0.4687     | 0.1463     | 0.059000     |
| H17  | -0.0404    | 0.3526     | -0.0333    | 0.075000     |
| H18  | 0.0735     | 0.1973     | -0.1300    | 0.073000     |
| H19  | 0.2923     | 0.1584     | -0.0471    | 0.062000     |
| H20A | 0.1142     | 0.5440     | 0.5914     | 0.077000     |
| H20B | 0.2048     | 0.5148     | 0.6861     | 0.077000     |
| H20C | 0.0607     | 0.4063     | 0.6019     | 0.077000     |
| H21A | 0.1891     | 0.2220     | 0.6384     | 0.076000     |
| H21B | 0.3167     | 0.3501     | 0.7201     | 0.076000     |
| H21C | 0.3584     | 0.2088     | 0.6656     | 0.076000     |
| H23A | 0.6148     | 0.4263     | -0.0641    | 0.105000     |
| H23B | 0.4935     | 0.2868     | -0.1186    | 0.105000     |
| H23C | 0.6659     | 0.2864     | -0.1033    | 0.105000     |
| H1S  | 0.4091     | -0.0644    | 0.0397     | 0.061000     |
| H1S1 | 0.1442     | -0.0087    | 0.0268     | 0.077000     |
| H1S2 | 0.2146     | 0.0351     | 0.1487     | 0.077000     |
| H1S3 | 0.2010     | -0.1160    | 0.0695     | 0.077000     |
| H23D | 0.5357     | 0.3877     | -0.0865    | 0.088000     |
| H23E | 0.6280     | 0.2719     | -0.1068    | 0.088000     |
| H23F | 0.7127     | 0.4262     | -0.0391    | 0.088000     |
| H1T  | 0.4091     | -0.0644    | 0.0397     | 0.061000     |
| H1T1 | 0.2026     | 0.0630     | 0.1277     | 0.092000     |
| H1T2 | 0.2321     | -0.0742    | 0.1369     | 0.092000     |
| H1T3 | 0.1712     | -0.0715    | 0.0251     | 0.092000     |

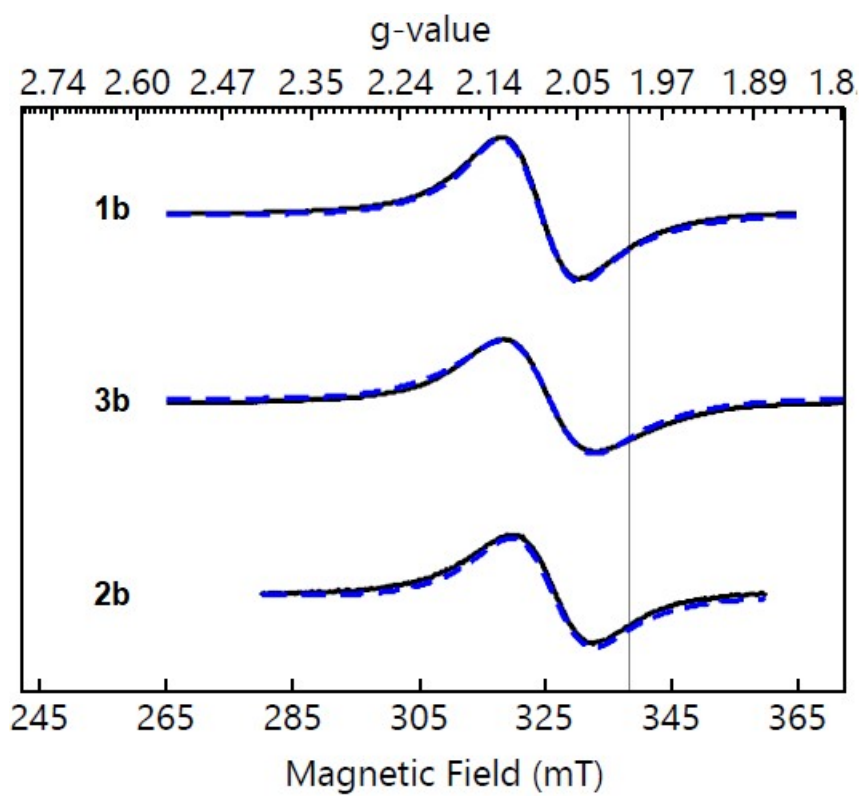

**Figure S19:** EPR data for complex **1b**, **2b**, and **3b** in acetonitrile at LNT.

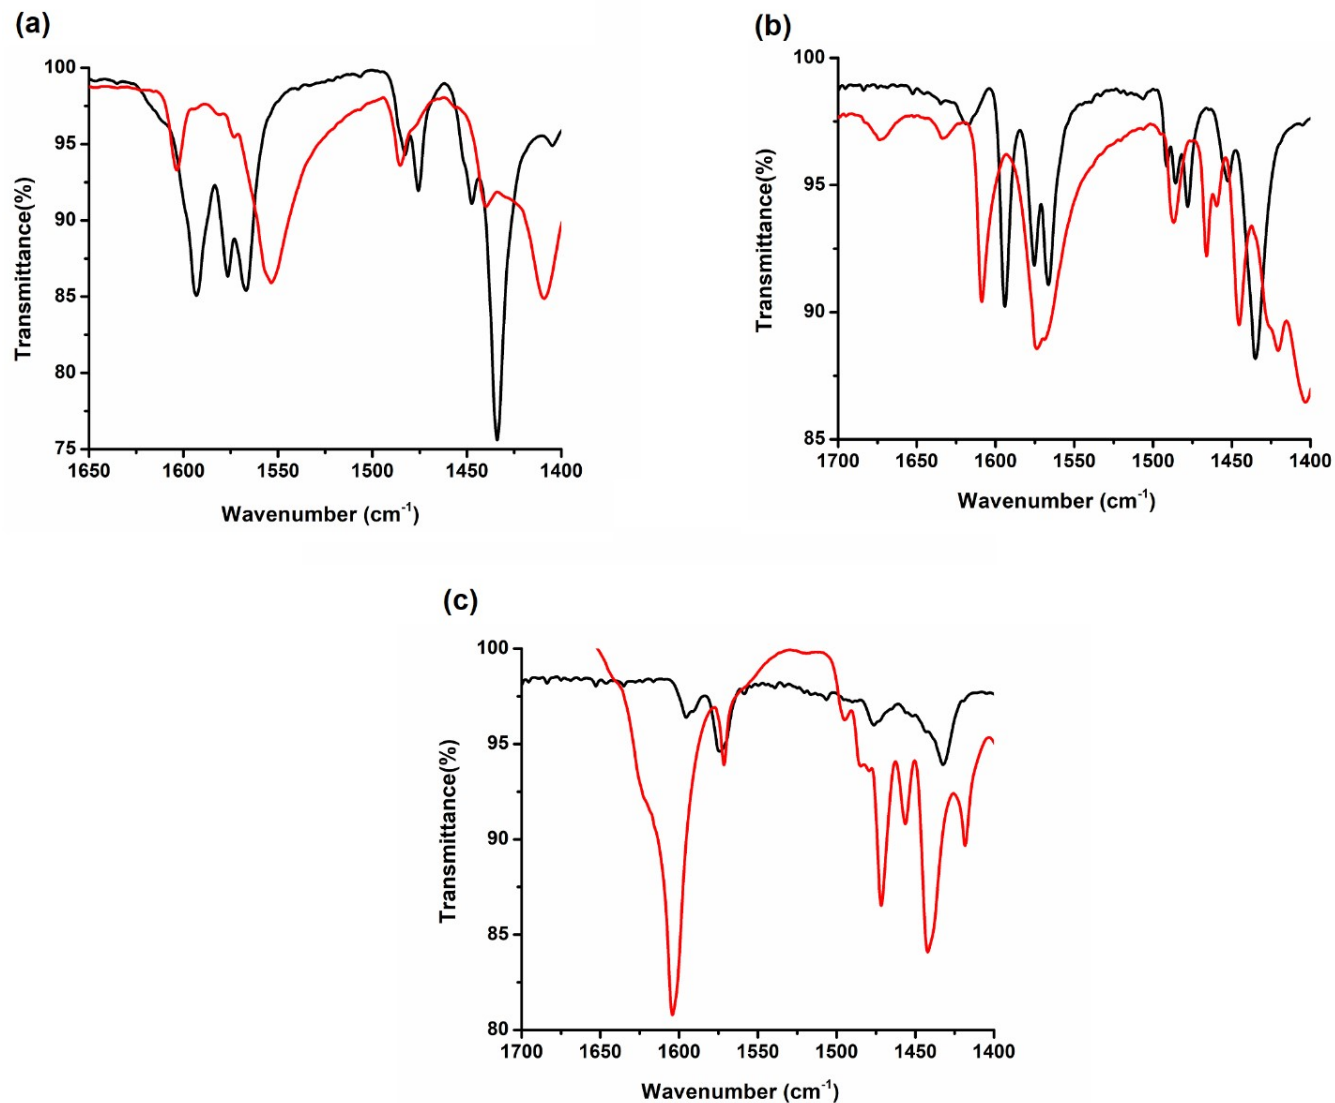

**Figure S20:** FT-IR spectra of (a) Comparison of compound **1a** (black) and complex **1b** (red), (b) Comparison of compound **2a** (black) and complex **2b** (red), (c) Comparison of compound **3a** (black) and complex **3b** (red).

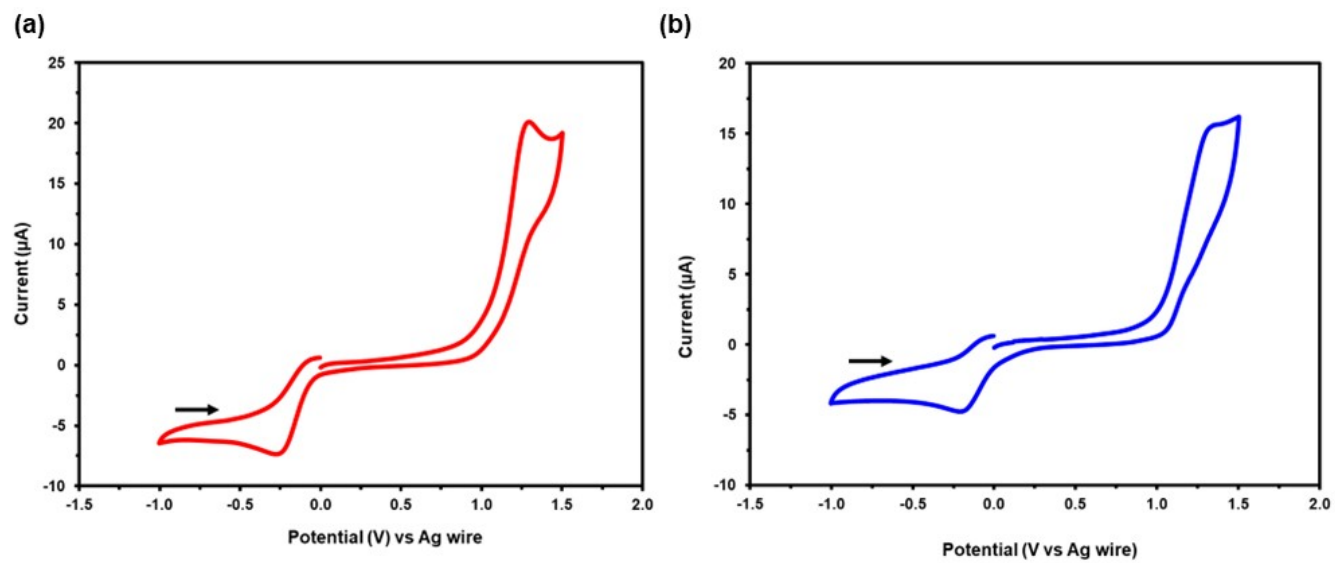

**Figure S21:** Cyclic voltammograms of (a) **1b** (red), and (b) **3b** (blue) in the absence of Fc.

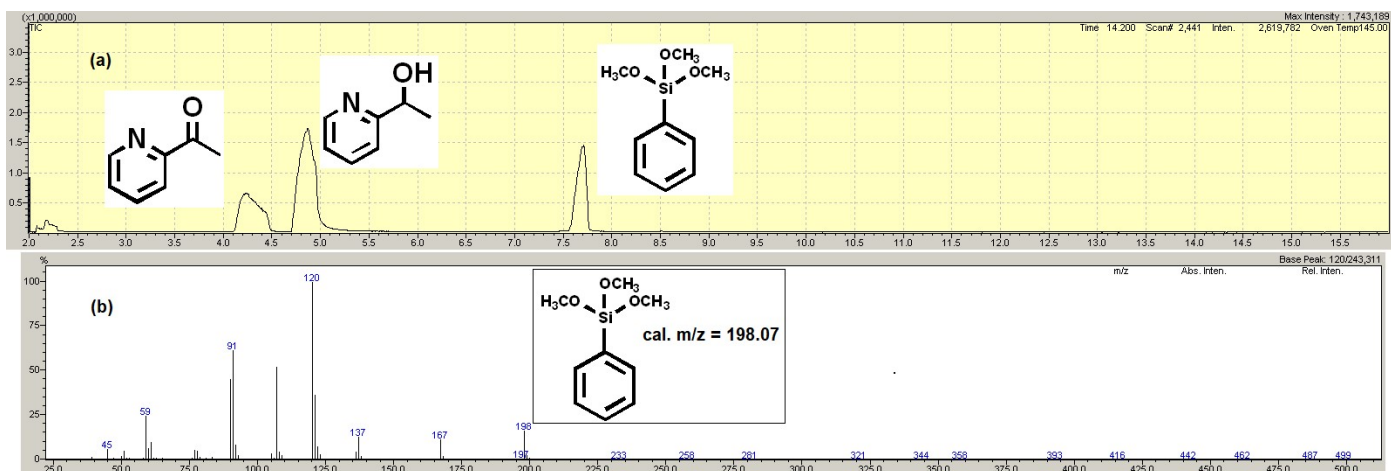

**Figure S22:** (a) GC for the hydrogenation of ketone in methanol as solvent, showing 2-acetylpyridine, 1-(pyridin-2-yl)ethan-1-ol and silylated byproduct containing the  $-\text{OCH}_3$  moieties. (b) Mass spectrum obtained from GC showing the formation of the methoxysilyl byproduct at 198 m/z.

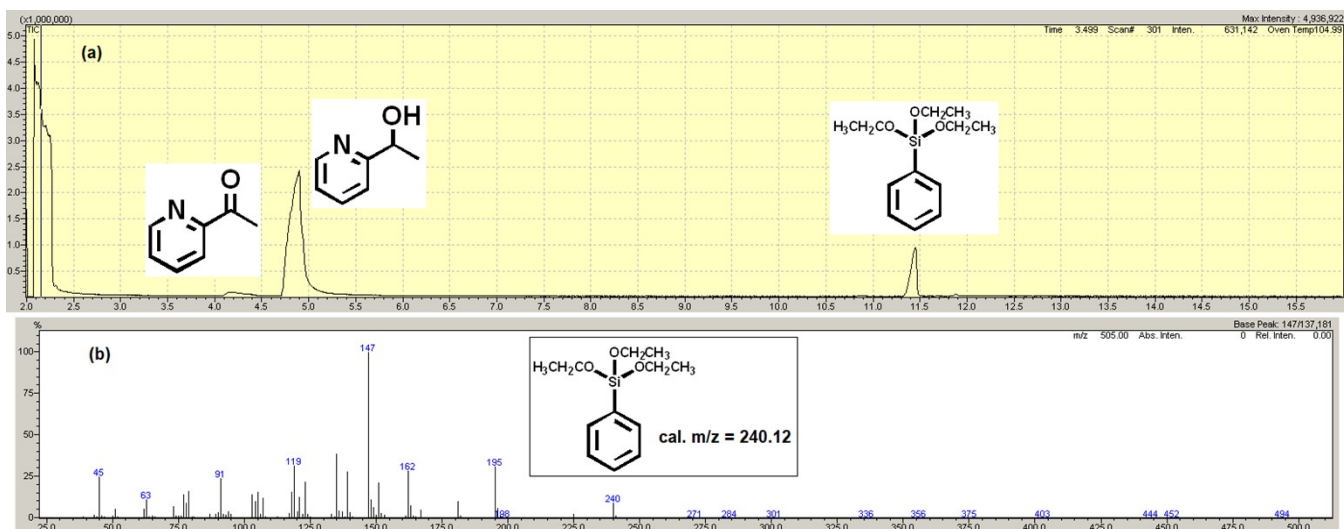

**Figure S23:** (a) GC for the hydrogenation of ketone in ethanol as solvent, showing 2-acetylpyridine, 1-(pyridin-2-yl)ethan-1-ol and silylated byproduct containing the  $-\text{OCH}_2\text{CH}_3$  moieties. (b) Mass spectrum obtained from GC showing the formation of the ethoxysilyl byproduct at 240 m/z.

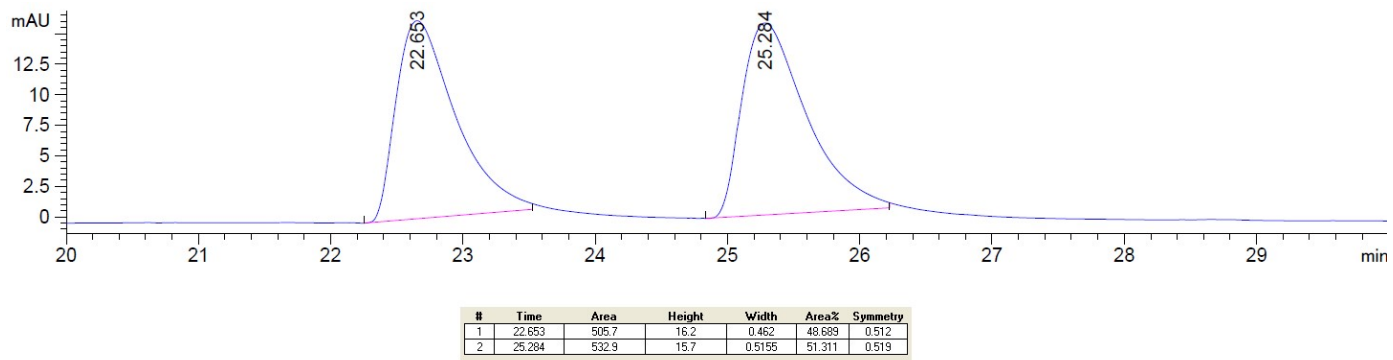

**Figure S24:** LC-MS data showing the *R*- and *S*- isomer alcohol products of 2-acetylpyridine hydrogenation using a Chiralpak IB N-5 analytical column.

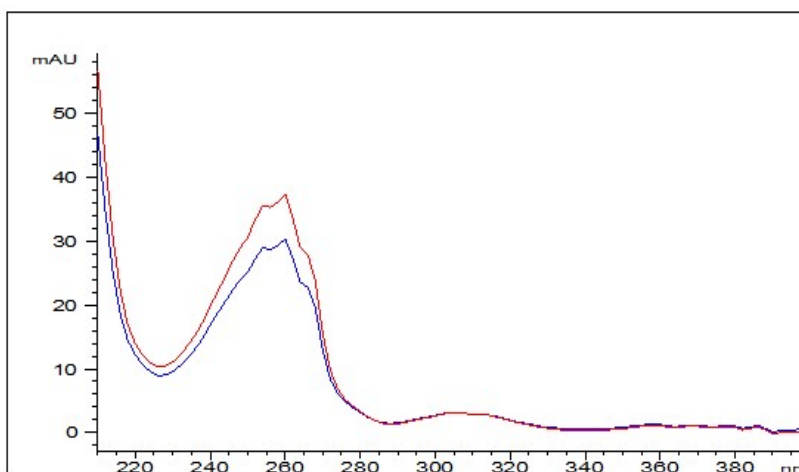

**Figure S25:** UV-vis data of the *R*- and *S*-isomer alcohol product of 2-acetylpyridine hydrogenation obtained from LC-MS.

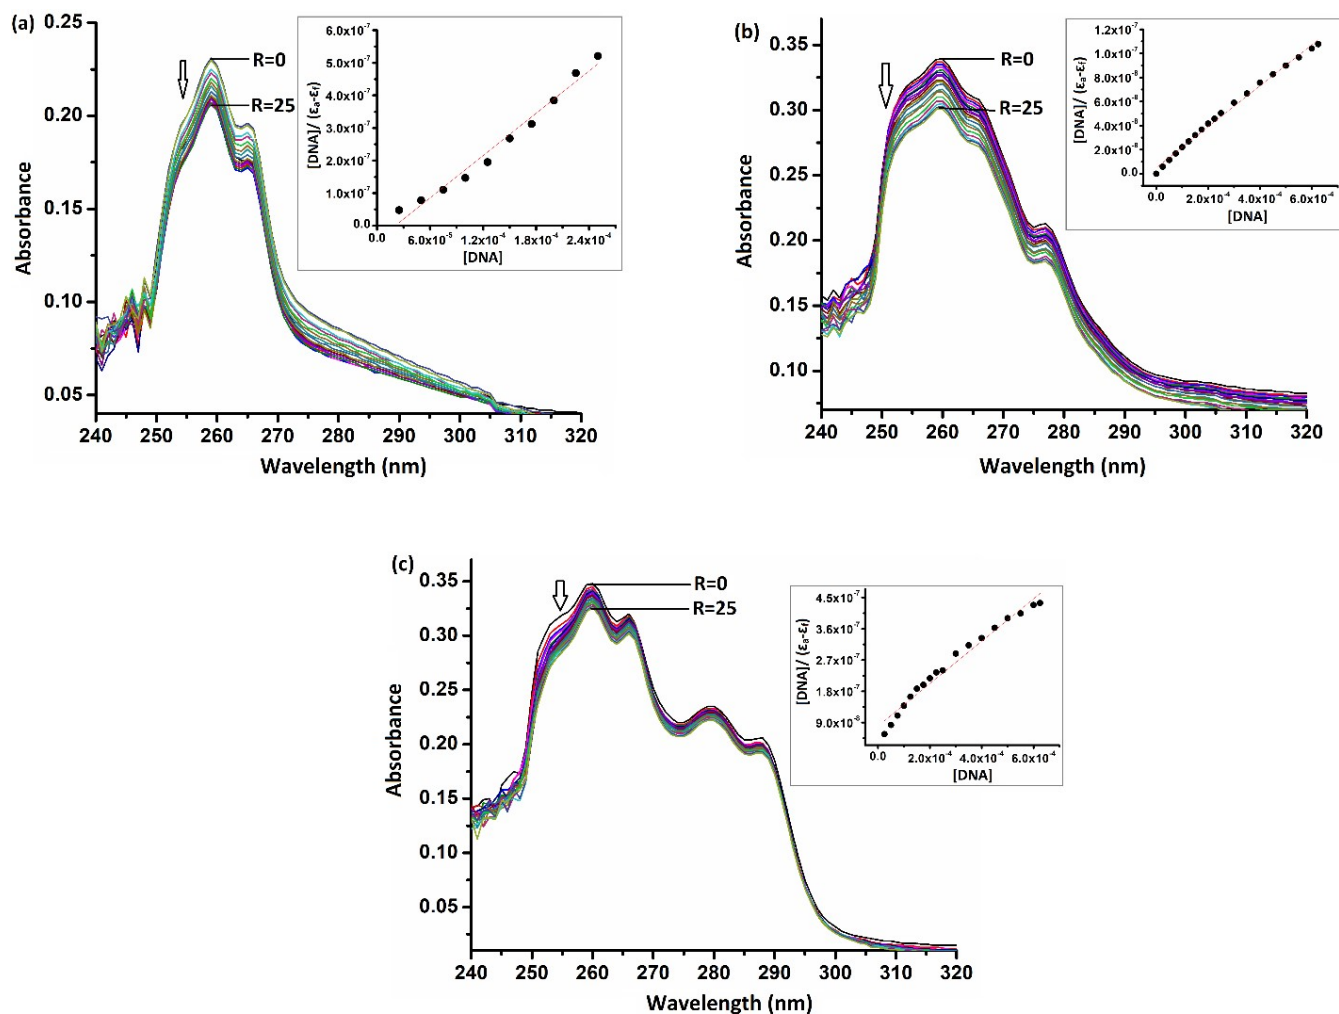

**Figure S26:** Absorption spectra of (a) **1b**, (b) **2b**, and (c) **3b** in 5 mM Tris-HCl buffer at pH 7.1, in the absence ( $R = 0$ ) and presence ( $R = 1-25$ ) of increasing amounts of CT DNA. Insets: the plot of  $[DNA]$  vs.  $[DNA]/(\epsilon_a - \epsilon_f)$  at  $R = 25$  of the complex **1b**, **2b**, and **3b**.

### **References:**

1. M. Sharma, M. Ganeshpandian, M. Majumder, A. Tamilarasan, R. Mukhopadhyay, N. Islam, and M. Palaniandavar, Octahedral copper(II)-diimine complexes of triethylenetetramine, Effect of stereochemical fluxionality and ligand hydrophobicity on Copper(II)/Copper(I) redox, DNA binding and cleavage, cytotoxicity and apoptosis-inducing ability, *Dalton Trans.*, 2020, **49**(24), 8282-8297.
2. M. Sharma, M. Ganeshpandian, A. Sanjeev, A. Tamilarasan, V. Mattaparthi, N. Islam, and M. Palaniandavar, Bis- and mixed-ligand copper(II) complexes of nalidixic acid the antibacterial drug, Mode of nalidixate coordination determines DNA binding and cleavage and cytotoxicity, *Inorganica Chim. Acta.*, 2020, **504**, 119450.
3. M. Sharma, B. Adhikari, R. Awoyemi, A. Perkins, A. Duckworth, B. Donnadieu, D. Wipf, S. Stokes, and J. Emerson, Copper (II) NHC Catalyst for the Formation of Phenol from Arylboronic Acid, *Chemistry*, 2022, **4**(2), 560-575.
4. Saint Program included in the package software: APEX4 v2021.4.0.
5. Bruker (2001). *Program name*. Bruker AXS Inc., Madison, Wisconsin, USA.
6. SHELXT-Integrated space-group and crystal-structure determination Sheldrick, G. M. *Acta Crystallogr., Sect. A* 2015, **A71**, 3-8.
7. SHELXTL Sheldrick, G. M. Ver. 2018/3. *Acta Crystallographica. Sect C Structural Chemistry* **71**, 3 - 8.
8. APEX3 v2021, 4.0, AXS Bruker program.
